# Supplementary material for: Charge-Transfer Regulated Visible Light Driven Photocatalytic H2 Production and CO2 Reduction in Tetrathiafulvalene Based Coordination Polymer Gel
Source: Research Square preprint supplement (doi:10.21203/rs.3.rs-96702/v1), 2020-11-09
Supplement: Supplementary file 2 [file 58c7972001b12454c09f9928.docx]

**Supporting Information**

**Charge-Transfer Regulated Visible Light Driven Photocatalytic H2 Production and CO2 Reduction in Tetrathiafulvalene Based Coordination Polymer Gel**

**S1. Materials and Methods**

Tetrathiafulvalene (TTF), 1,3-diaminopropane, 4′-chloro-2,2′:6′,2′′-terpyridine, Zinc nitrate (Zn(NO3)2.6H2O), Ethyl-4-bromobenzoate (Br-C6H4COOEt), Cesium carbonate (CsCO3), Palladium acetate, Tri-tertbutyl-phosphonium tetrafluoroborate (P*tBu3*.HBF4), Thionyl chloride (SOCl2), Chloroplatinic acid (H2PtCl6.6H2O) were purchased from Sigma-Aldrich chemical Co. Ltd. Spectroscopic grade solvents were used for all spectroscopic studies without further purification. UV-Vis absorption spectra were carried on a Perkin-Elmer lambda 900 spectrometer. 1H-NMR spectra were recorded on a Bruker AVANCE-400 spectrometer (at 400 MHz) with chemical shifts recorded as ppm, and all spectra were calibrated against TMS. 13C-spectrum was recorded at 150 MHz frequency using a Varian Inova 600 MHz spectrometer. UV-Vis spectra were recorded in a Perkin-Elmer lambda 900 spectrometer. Fourier transform infrared spectra (FT-IR) were recorded by making KBr pellets using Bruker IFS 66v/S Spectro-photometer in the region 4000−400 cm−1. Thermal stability of the materials was studied using Mettler Toledo TGA 850 instrument in the temperature range of 30-800°C with the heating rate of 5°C/min in N2 atmosphere. Powder X-ray diffraction (PXRD) patterns were measured by a Bruker D8 Discover instrument using Cu Kα radiation. Atomic force microscopy (AFM) measurements were carried out with a Nasoscope model Multimode 8 Scanning Probe Microscope to analyze the morphologies of the sample surface. For this analysis, samples were dispersed in ethanol and then coated on Si wafer by a drop-casting method. The Field Emission Scanning Electron Microscopic (FE-SEM) images, elemental mapping and Energy-dispersive X-ray spectroscopy (EDAX) analysis were recorded on a Nova Nanosem 600 FEI instrument. The xerogels were dispersed in ethanol and then drop-casted onto a small piece of silicon wafer followed by gold (Au) sputtering for FE-SEM measurements. Transmission Electron Microscopy (TEM) studies were done on JEOL JEM -3010 with accelerating voltage of 300 kV. For this analysis, the xerogels were dispersed in ethanol and drop casted on a carbon copper grid. Elemental analyses were carried out using a Thermo Scientific Flash 2000 CHN analyzer. MALDI was performed on a Bruker daltonics Autoflex Speed MALDI TOF System (GT0263G201) spectrometer. High-resolution mass spectrometry was carried out using Agilent Technologies 6538 UHD Accurate-Mass Q-TOFLC/MS. Time resolved photoluminescence (TRPL) and photoluminescence (PL) studies were performed on an Edinburgh instrument (FLS 1000).

**S2. Synthesis of Low Molecular Weight Gelator (LMWG) based linker (TPY-TTF):**

Synthesis of TPY-TTF is described in the following three steps:

**Step 1. Synthesis of 2,3,6,7-Tetra (4-carboxyphenyl) Tetrathiafulvalene [TTF(COOH)4]:** Synthesis and characterization of TTF(COOH)4 is already reported in the literature.1 We have followed similar procedure and characterization data was in good agreement to the literature report. Briefly, Pd(OAc)2 (39.6 mg, 0.176 mmol), P*t*Bu3.HBF4 (153.53 mg, 0.529 mmol), Cs2CO3 (1149.4 mg, 3.528 mmol) were placed in a 20 mL reaction flask under N2 atmosphere. THF (5.0 mL) was added, and the reaction mixture was stirred for 10 min at reflux. Then, a solution of Tetrathiafulvalene (120 mg, 0.588 mmol) and Ethyl-4-bromobenzoate (673.46 mg, 2.94 mmol) in THF (5.0 mL) was added. The reaction mixture was heated to reflux for 15 h. The organic compound was extracted with chloroform three times. The combined organic layer was washed with brine, dried over anhydrous Na2SO4 and concentrated in vacuum. Chromatographic purification on silica gel using hexane-chloroform as eluent afforded tetrathiafulvalene-tetra-benzoate (Et4TTFTB) as a red solid product (260 mg). Further, a 50 mL flask was charged with Et4TTFTB (260 mg) and subjected to three cycles of evacuation and refilling with N2. Next, degassed methanol (50 ml) and THF (20 ml) were added into it to generate a suspension. In a separate flask, sodium hydroxide aq. solution (6 g, 40 mL) was prepared, then degassed with N2 and added to Et4TTFTB solution under N2 atmosphere. The reaction mixture was heated at 60oC for 12 h. The reaction was then cooled to room temperature, and the solvents (THF and MeOH) were removed in a rotary evaporator under reduced pressure. Further, 1M solution of HCl was added to the reaction mixture that afforded a maroon precipitate of TTF(COOH)4, which was collected by filtration and washed with water followed by drying under high vacuum for 12 h. Yield: 189 mg (0.276 mmol, 84 %). 1H-NMR (400 MHz, DMSO-*d*6): *δ* = 8.13 (d, 8H, ArH), 7.63 (d, 8H, ArH). CHN analysis for C34H20O8S4 Calc.: C, 58.65; H, 2.89; S, 18.71%. Expt.: C, 59.63; H, 2.94; S, 18.73 %. HRMS: 685.0045, Exact Mass: 684.0041

**Step 2. Synthesis of 2,2′:6′,2′′-terpyridin-4´-yl-propane-1,3-diamine (TPY-NH2):**

The 2′;6′,2″-terpyridin-4′-yl-propane-1,3-diamine was synthesized by following a reported procedure.2 Briefly,4′-chloro- 2,2′:6′,2′′-terpyridine, (300 mg, 1.12 mmol) was dissolved in 1,3-diamino propane (2.16 ml). The reaction mixture was then refluxed at 120° C for 10 h. After cooling to room temperature, distilled water (25 mL) was added, which has yielded a white precipitate. The white solid was further dissolved in dichloromethane and washed twice with distilled water. The organic layer was combined and dried over anhydrous Na2SO4. The solvent was removed under reduced pressure to yield a solid white product. Yield: 82%. 1H-NMR (400 MHz, CDCl3): *δ* = 8.53 (d, 2H, ArH), 8.52 (d, 2H, ArH), 7.76 (t, 2H, ArH), 7.60 (s, 2H, ArH), 7.25 (t, 2H, ArH), 5.16 (t, 1H, NH), 3.41 (m, 2H, NHCH2), 2.84 (m, 2H, CH2), 1.77 (m, 2H,NH2CH2). Selected FT-IR data (KBr, cm-1): 3340 (b), 2965 (m), 1610-1560 (s), 1464 (m), 1402 (m), 1261 (m), 1094-981 (s), 791 (s). CHN analysis for C18H19N5 Calc.: C, 70.81; H, 6.22; N, 22.95%. Expt.: C, 70.90; H, 6.11; N, 22.83%.

**Supplementary Figure 1.** (a) Synthetic scheme and (b) 1H NMR of **TTF(COOH)4**in DMSO-*d*6.

**Supplementary Figure 2.** (a) Synthetic scheme and (b) 1H NMR of **TPY-NH2** in DMSO-*d*6.

**Step 3: Synthesis of LMWG (TPY-TTF):** TTF(COOH)4 (634 mg, 1.65 mmol) was dissolved in 50 ml of dry THF and SOCl2 (2.4 ml, 33 mmol) was added into it under inert condition. The reaction mixture was refluxed for 2 h at 65°C. Then the reaction mixture was distilled at 120°C to remove excess SOCl2 and yielded solid precipitate of acid chloride. Next, solid ppt was dissolved in 40 ml of dry THF. Now the solution of TPY-NH2 (2.21 g, 7.26 mmol) in 10 ml of dry THF along with triethylamine (1.25 ml, 9 mmol) was added to the solution of acid chloride dropwise at 0°C. The reaction was stirred at 0°C for 12 hr. The solid ppt was formed which was filtered and washed with chloroform and acetone to remove unreacted TPY-NH2. The yield of isolated dark red solid precipitate was found to be 28%. 1H NMR (400 MHz, DMSO -*d6*): *δ* = 8.86 (d, 8H), 8.64 (broad, 4H), 7.86 (d,8H), 7.76 (m, 8H), 7.69 (s, 8H), 7.29 (m, 8 H), 7.12 (m, 8H), 4.41 (m, 4H), 3.59 (m, 8 H), 3.44 (m, 8H), 1.94 (m, 8H). 13C NMR{1H} (150 MHz, DMSO -*d6*): *δ* = 159.78, 150.02, 146.36, 138.95, 129.48, 127.20, 124.71, 121.95, 121.23, 106.59, 105.58, 59.76, 30.91, 28.09, 26.45. Selected FT-IR data (KBr, cm-1): 3376 (b), 3232 (w), 3036 (s), 2930 (w), 1635 (s), 1573 (s), 1475, 1362, 1301 (w), 1102 (w), 990 (w), 849(w), 786 (s), 611(b). CHN analysis for C106H88N20O4S4 Calc.: C, 69.81; H, 4.82; N, 15.25%; S: 6.78. Expt.: C, 69.41; H, 4.84; N, 15.27; S, 6.99. MALDI-TOF: m/z calculated for C106H88N20O4S4: 1834.22; found: [M+H]1835.06.

**Supplementary Figure 3.** (a) Synthetic scheme and(b) 1H-NMR spectrum of **TPY-TTF** in DMSO-*d*6.

**Supplementary Figure 4.** 13C-NMR spectrum of **TPY-TTF** in DMSO-*d*6.

**Supplementary Figure 5.** MALDI-TOF spectrum for **TPY-TTF**.

**Supplementary Figure 6.** FT-IR for **TPY-TTF**.

**S3. Synthesis and characterizations of TPY-TTF-OG:**

TPY-TTF (10 mg) was dissolved in a mixture of MeOH/DCM/H2O (2:1:1 ratio) (300 μl) and sonicated for 2-3 min and then heated at 60 ºC to get a homogenous viscous solution. The mixture was cooled to room temperature and kept for 2 h which has resulted in an opaque organo gel (OG). The formation of the gel was confirmed by an inversion-test method. For various characterization, TPY-TTF OG was dried at 80°C under vacuum to form the xerogel. Selected FTIR data (KBr, cm-1): 3392 (b), 3051 (s), 2945 (w), 1649 (s), 1581 (s), 1460 (s), 1362 (w), 1294-1096 (w), 976 (w), 839 (s), 786 (s), 619 (b).

**Supplementary Figure 7.** FT-IR for **TPY-TTF OG**.

**Supplementary Figure 8.** EDAX analysis for **TPY-TTF** **OG**.

**Supplementary Figure 9.** Kubelka-Munk plot for **TPY-TTF OG** and **Zn-TPY-TTF** **CPG** obtained by UV-visible diffused reflectance spectrum.


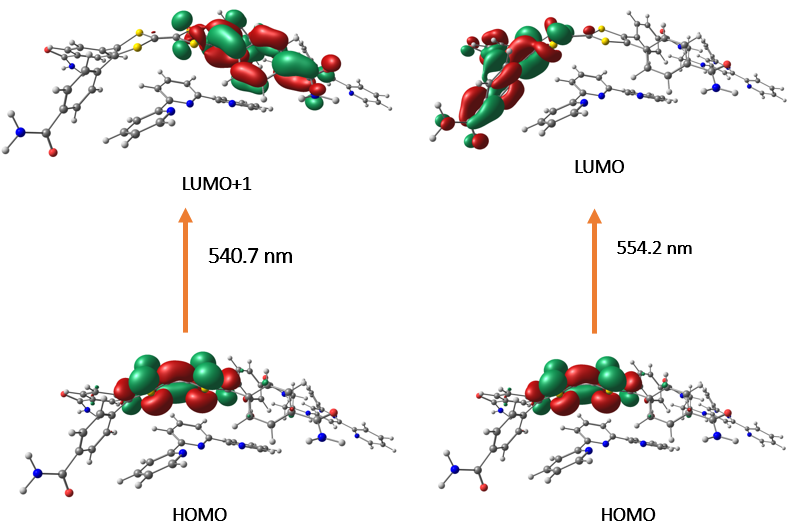


**Supplementary Figure 10.** Intramolecular charge transfer for **TPY-TTF**. (Isovalue=0.03).

**S4. Synthesis and characterizations of Zn-TPY-TTF coordination polymer gel (CPG):**

We have used Zn(NO3)2.6H2O salt for the synthesis of Zn-TPY-TTF CPG. TPY-TTF (10 mg, 5 μmol) was taken in the 300 μl solvent mixture of MeOH/DCM/H2O (2:1:1 ratio), and 10 μmol of ZnII was added into it at 60°C. The reaction mixture was heated for a few minutes to get a viscous solution and kept for 4 h at room temperature which transformed into an opaque gel. Formation of Zn-TPY-TTF gel was confirmed by an inversion test method. Further, xerogel of Zn-TPY-TTF was synthesized by heating the gel at 80°C under vacuum for 8 h. FT-IR data for Zn-TPY-TTF (KBr, cm-1): 3414 (b), 2922 (s), 2672 (s), 2490 (s), 1619 (s), 1468 (s), 1377 (w), 1233-1021 (w), 791 (s), 629 (b), 536 (b). CHN analysis forC106H88N24O16S4Zn2; Elemental Analysis: Calc.: C, 57.48; H, 4.10; N, 15.18; S, 5.79. Expt.: C, 57.34; H, 3.96; N, 15.12; S, 5.75.

**Supplementary Figure 11.** FT-IR for **Zn-TPY-TTF** CPG.

**Supplementary Figure 12.** EDAX analysis for **Zn-TPY-TTF** CPG.


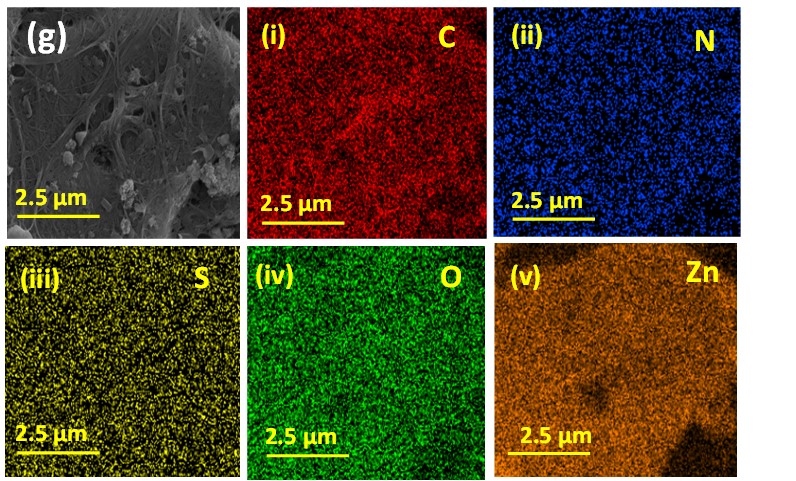


**Supplementary Figure 13.** Elemental mapping for **Zn-TPY-TTF** CPG.

**Supplementary Figure 14.** TGA plot for **Zn-TPY-TTF** CPG xerogel under N2 atmosphere.


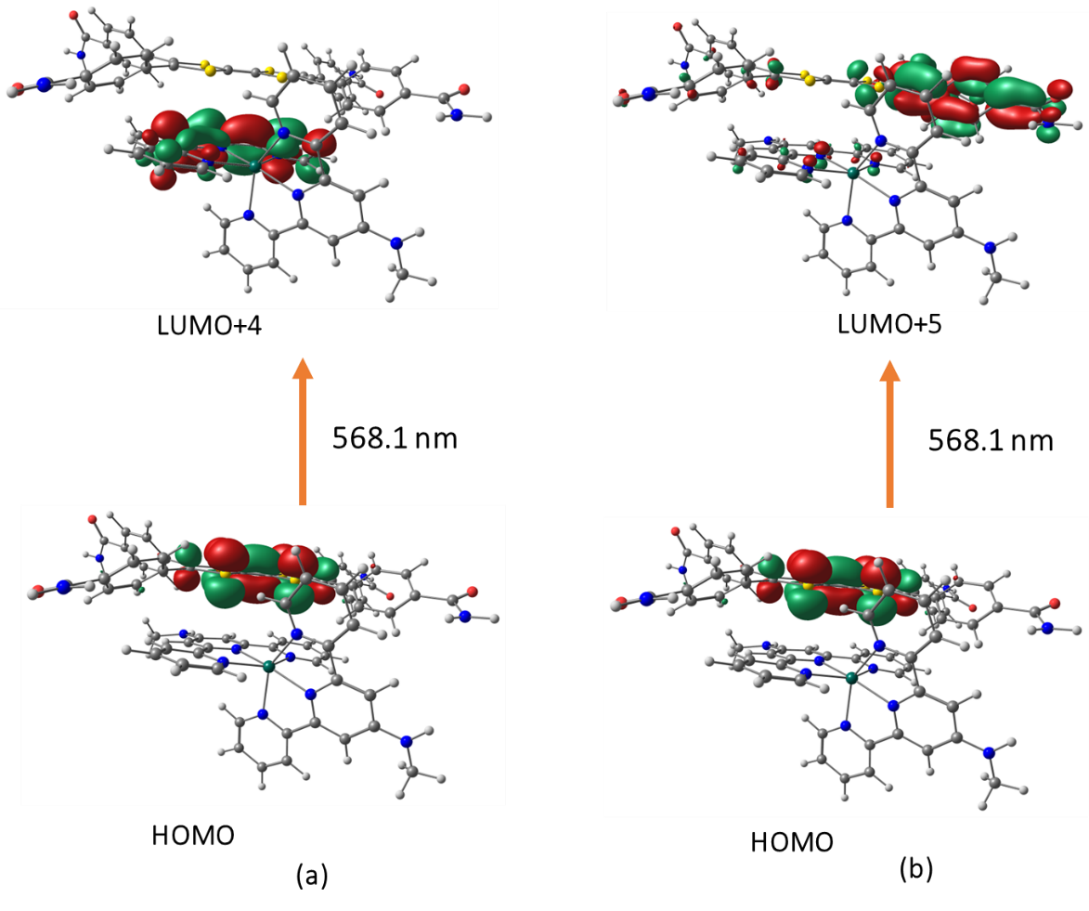


**Supplementary Figure 15.** (a) Intermolecular charge transfer (coefficient (c) = 0.31) at 568 nm. (b) Intramolecular charge transfer (coefficient (c) = 0.15) for **Zn-TPY-TTF** at 568 nm. (Isovalue = 0.03).

**Table 1. Calculated CT transfer spectra (in nm) of TPY-TTF and Zn-TPY-TTF using different exchange correlation energy functional.**

| System | CAM-B3LYP | wB97XD |
| --- | --- | --- |
| TPY-TTF | 540.7, 554.2 | 497.7, 527.0 |
| Zn-TPY-TTF | 568.1, 588.9 | 541.0, 561.7 |

**S5.** **Electrochemical characterizations:**

1. **Mott–Schottky measurement**

The energy band structure of TPY-TTF and Zn-TPY-TTF and Pt@Zn-TPY-TTF was depicted by the Mott Schottky (MS) analysis (at 1000 Hz, from -2.0 V to +2.0 V) using ITO as a working electrode (WE) in N2-purged aqueous solution of 0.5 M Na2SO4 at pH=7, Pt as a counter electrode (CE) and Ag/AgCl as a reference electrode (RE). The curve was fitted by Eq. 1.3 An electrochemical ink prepared by making a dispersion of a mixture of catalyst (2.0 mg) in the solvent mixture of isopropanol (500 μl), water (500 µl) and Nafion (14 µl). Upon sonication for 20 minutes, a well-dispersed ink (3.5 μl) was drop cast over the ITO electrode and allowed to dry for 3 h under ambient condition.

1/C2 = (2/ εε0 *A2 e* ND) (E-EFB - *k*BT/e)- Eq.1

Where, C and A are the interfacial capacitance and area, respectively. εis the dielectric constant of the semiconductor, and ε0 is the permittivity of free space. *k*B Boltzmann constant, *T* the absolute temperature and *e* is the electronic charge. *N*D the number of donors, *V* the applied voltage. Therefore, a plot of 1/*C*2 against *V* should yield a straight line from which *V*fb can be determined from the intercept on the *V* axis.

**Calculation of Conduction Band (ECB) and Valance Band (EVB) versus RHE (at pH=7):**

The conduction band edge (CBEdge) potentials for TPY-TTF and Zn-TPY-TTF was assigned based on flat band potentials and valance band (VB) position was calculated by using equation 2.

EVB = ECB Edge + Band Gap -Eq. 2

1. **For TPY-TTF- OG**

ECB Edge (**TPY-TTF**) = Vfb= -0.60 V

EVB (**TPY-TTF**) = -0.60 + Band Gap **(TPY-TTF)** = -0.60 + 2.26= 1.66 V

1. **Zn-TPY-TTF CPG**

ECB Edge (**Zn-TPY-TTF**) = Vfb= -0.54 V

EVB (**Zn-TPY-TTF**) = -0.54 + Band Gap **(Zn-TPY-TTF)** = -0.54 + 2.27= 1.73 V

**(b) Photocurrent Measurement**

The similar set up was used for photocurrent measurements as employed for Mott-Schottky analysis. Here, the photocurrent study was performed for TPY-TTF, Zn-TPY-TTF and Pt@ Zn-TPY-TTF upon consecutive light “ON–OFF” cycles for 30 s over 10 cycles.

**(c) Impedance analysis**

Electrochemical impedance spectroscopy (EIS) was performed in a three-electrode cell configuration with a glassy carbon electrode as the working electrode (WE), platinum as a counter electrode (CE) and Ag/AgCl as a reference electrode (RE). 0.5 M Na2SO4 was used as an electrolyte at pH = 7. An electrochemical ink prepared by making a dispersion of a mixture of catalyst (2.0 mg) in the solvent mixture of isopropanol (500 μl) and water (500 μl). Upon sonication for 30 minutes, a well-dispersed ink (3.5 μl) was drop cast over the GC electrode and allowed to dry for 3 h under ambient condition. EIS were recorded at -1.2 VRHE applied bias from 0.1 Hz to 100 KHz (under the dark condition and visible light irradiation).

**S6. Photocatalytic water reduction experiments:**

**Experimental set-up for photocatalytic water reduction:** Photocatalytic H2 evolution experiments were carried out in an 80 mL self-designed borosilicate glass cell containing a magnetic stir bar sealed with a small septum (picture of photocatalytic cell is given in Figure S21). For photocatalytic experiment, 1 mg catalyst was dispersed in 38 mL water containing 2 ml of triethylamine (TEA) as a sacrificial agent. The suspension was ultrasonicated to make a homogeneous dispersion. The reaction mixture was then purged with N2 for 30 minutes to remove any traces of dissolved H2 gas which was ensured by GC-analysis before performing the photocatalysis. The reaction mixture was irradiated with a 300 W Xe lamp (Newport) fitted with a 12 cm path length of water filter for removal of IR radiation. A visible bandpass filter (420 nm–750 nm) was used to block the UV light. The Headspace gases were sampled using Hamilton air-tight syringes by injecting 250 µL into the gas chromatograph (Agilent CN15343150). Gas Chromatography referencing was done against a standard (H2/N2) gas mixture with a known concentration of hydrogen for the calibration curve, where N2 used as a carrier gas and a thermal conductivity detector (TCD) used for H2 detection. Notably, no hydrogen evolution was observed for a mixture of water/5 Vol % TEA under visible light irradiation in the absence of a photocatalyst.

**Calculation of TON**

**Formula; TON=** Amount of product evolved (μmol) / Amount of catalyst (μmol)

1. **Calculation of TON for H2 production:**
2. For TPY-TTF:

1 mg of TPY-TTF equivalent to 0.545 μmol and the amount of H2 evolved was found to be 2 μmol from 1 mg of TPY-TTF in 20 h. Therefore, TON was calculated for TPY-TTF in 20 h is 3.6.

1. For Zn-TPY-TTF:

The unit of Zn-TPY-TTF was calculated based on a binding ratio of TPY-TTF with Zn(NO3)2 in CPG (1:2). Therefore, unit formula weight= 2212.94. Then, 1 mg Zn-TPY-TTF catalyst contains 0.451 μmol. Therefore, the TON can be calculated for Zn-TPY-TTF in 20 h is 23.5.

1. For Pt@Zn-TPY-TTF:

The unit of Pt@Zn-TPY-TTF was also calculated based on a binding ratio of TPY-TTF with Zn(NO3)2 in CPG (1:2) because of low wt% of Pt NP present on CPG. Therefore, the TON can be calculated for Pt@Zn-TPY-TTF in 11 h is 359.2.

**Supplementary Figure 16.** (a) Photocatalysis by **Zn-TPY-TTF** in xerogel and gel state and (b) stability test for **Zn-TPY-TTF** under visible light irradiation for water reduction. The reaction vessel was degassed by N2 after every 6 h. (c) FE-SEM image and (d) TEM image of **Zn-TPY-TTF CPG** after photocatalytic water reduction.


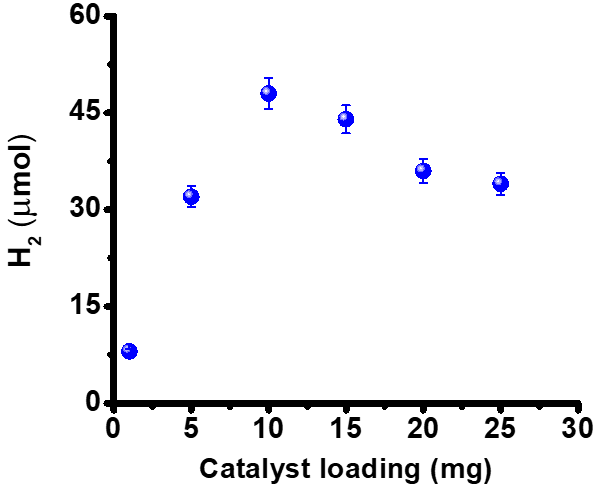


**Supplementary Figure 17.** Effect of **Zn-TPY-TTF CPG** loading (in mg) for photocatalytic water reduction under visible light irradiation for 10 h.

**S7. Control experiments:**

**S7.1. Photocatalytic activity for structural units:**

**Supplementary Figure 18.** TON of only triethylamine (**TEA**), **TTF(COOH)4**, **TPY-TTF OG**, **Zn-TPY-TTF** (2:1 ratio) polymer and **Zn-TPY-TTF CPG** (2:1 ratio) under visible light irradiation for 6 h. (all the catalysts were dispersed in water and TEA as sacrificial agent).

**S7.2. Synthesis of Zn-TPY-TTF (2:1) Polymer:**

We have synthesized Zn-TPY-TTF polymer using TPY-TTF LMWG and metal salt in the ratio of 1:2. TPY-TTF (10 mg, 5 μmol) was taken in 2 ml MeOH and 500 μmol of ZnII in MeOH was added TPY-TTF solution. The reaction mixture was stirred in a close vial for 2 h at 75°C which has resulted to a dark red precipitate.

**Supplementary Figure 19.** (a) FE-SEM image, (b) TEM of **Zn-TPY-TTF polymer.**

**S7.3. Synthesis and characterization of Zinc-TTF-TA Coordination Polymer (Zn-CP):** Zn-TTF-TA coordination polymer was prepared based on a reported procedure in the literature.4 In brief, TTF(COOH)4 (100 mg, 0.146 mmol) was taken in a mixture of 12 ml dimethyl formamide (DMF) and 4 ml ethanol (EtOH). 8 ml aqueous solution of Zn(NO3)2.6H2O (0.5 mmol) was added into it, and the reaction mixture was heated at 75°C for 72 h in a closed vial and resulted into brown powder. The obtained precipitate was washed with DMF and EtOH for three times. The obtained product Zn-CP was dried under vacuum at 120°C for 2 h and yield was found to be 78 mg. The thermal stability was analysed by TGA, which showed the stability upto ~398°C.


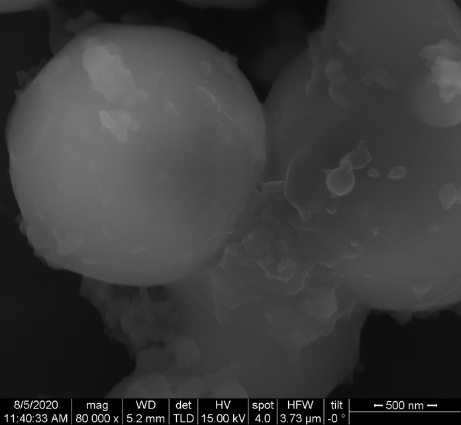


**Supplementary Figure 20**. FESEM image for **Zn-CP**.

**Supplementary Figure 21**. (a) EDAX and (b) elemental mapping for **Zn-CP**.


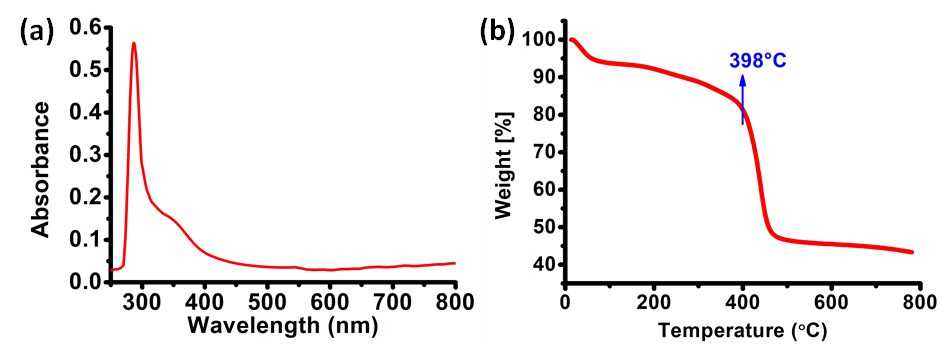


**Supplementary Figure 22**. (a) UV-Visible absorption spectrum for **Zn-CP** (thin film on quartz plate). (b) TGA plot for **Zn-CP** under N2 atmosphere.

**Supplementary Figure 23**. PXRD for **Zn-CP** (as synthesized).

**S8. Synthesis and characterization of Pt@Zn-TPY-TTF:** In-situ platinum nanoparticles (Pt) has been stabilized in the matrix of Zn-TPY-TTF CPG using a reported procedure.5 Briefly, 1 mg of H2PtCl6·6H2O was dispersed in 40 ml of water containing 10 mg of Zn-TPY-TTF. After continuous stirring for 1 h in a closed system, the well-dispersed solution was irradiated using 300 W xenon lamp (Newport) with a 6.0 cm long IR water filter for 2 h. Finally, the Pt nanoparticle stabilized CPG sample (Pt@Zn-TPY-TTF) was thoroughly washed with deionized (DI) water and dried under vacuum at 80°C for 12 h.

**Supplementary Figure 24.** (a) FE-SEM image and (b) EDAX analysis for **Pt@Zn****-TPY-TTF**.

**Supplementary Figure 25.** Elemental mapping for **Pt@Zn-TPY-TTF**.

**Supplementary Figure 26.** (a) Effect of **Pt@Zn-TPY-TTF** loading (in mg) for photocatalytic water reduction under visible light irradiation for 10 h. (b) Stability test for **Pt@Zn-TPY-TTF CPG** under visible light irradiation for water reduction. The reaction vessel was degassed by N2 after every 6 h. (c) Light On-Off experiments for visible light-driven H2 formation during photocatalytic water reduction by **Pt@Zn-TPY-TTF**.


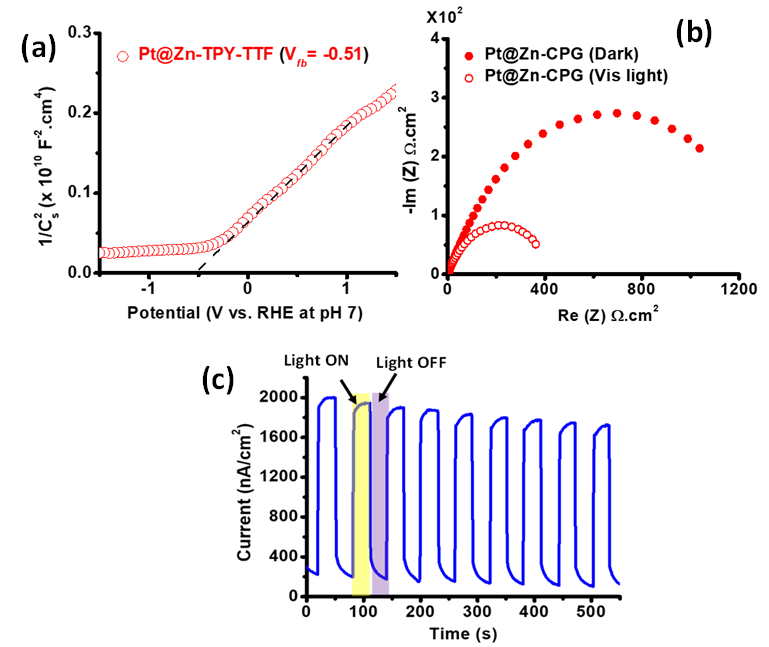


**Supplementary Figure 27.** (a) Mott-Schottky plot for **Pt@Zn-TPY-TTF** (at 1000 Hz, from -1.5 V to + 1.5 V). (b) Nyquist plots of **Pt@Zn-TPY-TTF** under visible light and the dark condition at -1.20 VRHE applied bias (in 0.5 M Na2SO4). (c) Photocurrent study of **Pt@Zn-TPY-TTF** based on light ON-OFF cycles.

**S9. Study of Time resolved photoluminescence (TRPL):**


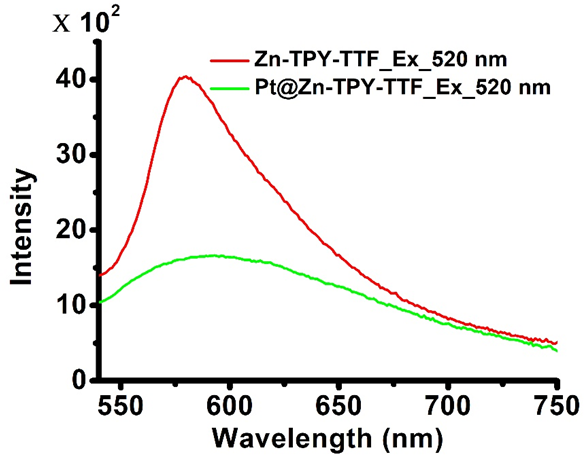


**Supplementary Figure 28.** PL spectra for **Zn-TPY-TTF** CPG and **Pt@Zn-TPY-TTF** CPG.

**Supplementary Figure 29**. TRPL decay spectra (a) For **Zn-TPY-TTF**. (b) For **Pt@Zn-TPY-TTF**.

**Lifetime calculations:** Lifetime data for Zn-TPY-TTF and Pt@Zn-TPY-TTF CPG were collected upon exciting at 510 nm. The average lifetime is calculated using following formula:

**Average life time, τavg(ns) = (ΣAiτi2/ΣAiτi**)

Where, **τavg** = average lifetime in nano-seconds, **Σ**Ai = sum of percentage of all the components exist in the excited state, Στi = sum of excited state lifetime of all the component.

**Table 2. Lifetime data:**

| **Sample** | 𝝉1 | A1 | 𝝉2 | A2 | 𝝉3 | A3 | **𝝉av** |
| --- | --- | --- | --- | --- | --- | --- | --- |
| **Zn-TPY-TTF** | 1.95 | 53.66% | 1.95 | 42.31% | 6.01 | 4.03% | **1.95** |
| **Pt@Zn-TPY-TTF** | 0.22 | 42.74% | 0.22 | 49.64% | 3.82 | 7.62% | **0.22** |

**S10. Quantum efficiency measurements**

The quantum efficiency is defined by the ratio of the effective electron used for product formation to the total input photon flux.

Where n is the number of electrons used in the photocatalysis process, *Y* is the yield of evolved gas from the sample (mol), *N* is the Avogadro’s number (6.0221023 mol-1), is the photon flux, *T* is the irradiation time, and *S* is the illumination area (12.56 cm2). The photon flux was calculated at 400 nm, 450 nm, 500 nm, 550 nm, 600 nm, 650 nm, 700 nm by using separate bandpass filters with the help of power meter.

Since the reduction of a water molecule to the H2 molecule requires two-electron (*n*=2). The following calculation is based on data from water photoreduction with Zn-TPY-TTF CPG for 1 h, QE% was calculated as 0.76 % at 550 nm. Meanwhile, the Q.E. of H2 for the Pt@Zn-TPY-TTF CPG was also calculated at the various wavelength (400-700 nm), and the maximum was found at 550 nm, which was calculated to be 14.47%.

**Supplementary Figure 30.** Quantum efficiency for H2 formation by **Pt@Zn-TPY-TTF** at a different wavelength (400 nm to 700 nm) (for this experiment 1 mg of sample was dispersed in 12 ml H2O with TEA (0.6 ml) as sacrificial donor).

**S11. Comparison table for photocatalytic H2 evolution:**

**Table 3. Photocatalytic H2 evolution activity of TPY-TTF, Zn-TPY-TTF and Pt@Zn-TPY-TTF under visible light irradiation (from 420-750 nm).**

| Catalyst | Reaction medium | Amount of H2 production(mmol/g) | Irradiation Time (h) | Activity (μmol g-1 h-1) | TON |
| --- | --- | --- | --- | --- | --- |
| TPY-TTF | H2O/TEA | 2.00 mmol/g | 20 h | 100 μmol g-1 h-1 | 3.6 in 20 h |
| Zn-TPY-TTF (1:2) CPG | H2O/TEA | **10.60 mmol/g** | 20 h | **530 μmol g-1 h-1** | 23.5 in 20 h |
| Zn-TPY-TTF Polymer | H2O/TEA | 1.58 mmol/g | 6 h | 264 μmol g-1 h-1 | 3.5 in 6 h |
| Pt@Zn-TPY-TTF | H2O/TEA | **162.42 mmol/g** | 11 h | **14727 μmol g-1 h-1** | 360.1 in 11 h |
| Zn-TPY-TTF (1:2) CPG | H2O | 0.92 mmol/g | 20 h | 46 μmol g-1 h-1 | 2.0 in 20 h |
| Pt@Zn-TPY-TTF CPG | H2O | 2.93 mmol/g | 6 h | 488 μmol g-1 h-1 | 6.5 in 6 h |

**Table 4. Photocatalytic H2 evolution activity of TPY-TTF, Zn-TPY-TTF and Pt@Zn-TPY-TTF under direct sunlight irradiation.**

| Catalyst | Amount of H2 evolution (mmol/g) | Irradiation Time (h) | Activity (μmol g-1 h-1) | TON |
| --- | --- | --- | --- | --- |
| Zn-TPY-TTF (1:2) CPG | 5.14 mmol/g on 15th April | 6 h (10 am to 4 pm) | 857 μmol g-1 h-1 | 11.9 in 6 h on 15th April 2019 |
| Pt@Zn-TPY-TTF CPG | 72.02 mmol/g on 27th June | 6 h (10 am to 4 pm) | 12000 μmol g-1 h-1 | 159.7 in 6 h on 27th June |

**Table 5. Comparison table of the H2 evolution of Zn-TPY-TTF and Pt@Zn-TPY-TTF with some of the reported benchmark hybrid materials under visible light irradiation.**

| S. No. | Catalyst | Reaction medium | activity for H2 | QY | ref |
| --- | --- | --- | --- | --- | --- |
|  | **Zn-TPY-TTF CPG** | H2O/ TEA | **530** μmol g-1 h-1 | 0.76 % at 550 nm | **This work** |
|  | **Pt@Zn-TPY-TTF CPG** | H2O/ TEA | **14765** μmol g-1 h-1 | 14.47 % at 550 nm | **This work** |
|  | g-C3N4/ Pt Co-catalyst (urea-CN*x*) | H2O/ MeOH | 17 nmol h-1 | 17.9 % at 400 nm | ref6 |
|  | NiFeSe]-hydrogenase (H2ase)/ NiP+ CNx | H2O/ TEOA | 155 mol (molNiP)-1 | 0.005 % at 465 nm | ref7 |
|  | N2-COF/ chloro(pyridine) cobaloxime co-catalyst | H2O, acetonitrile/ TEOA | 782 μmol g-1 h-1 | 0.16% at 400 nm | ref8 |
|  | Thiazolo[5,4-d]thiazole-COF (TpDTz)+ Ni- cluster co-catalyst | H2O/ TEOA | 941 μmol g-1 h-1 | 0.2% at 400 nm | ref9 |
|  | CN-ATZ-NaK/ 3wt% Pt NP | H2O/ TEOA | 630 μmolh-1 | 0.65 at 420 nm | ref10 |
|  | FS-TEG | H2O, MeOH/ TEA | 2.9 mmol g-1 h-1 | 10% at 420 nm | ref11 |
|  | dibenzo[*b,d*]thiophene sulfone-dibenzo[*b,d*]-thiophene co-polymer (P64) | H2O, MeOH/ TEA | 6038.5 μmol g-1 h-1 | 20.7% at 420 nm | ref12 |
|  | 27.5 wt % CdSe-loaded CdS / 1wt% Pt NP | H2O/ Na2S, Na2SO3 | 16353 μmol g-1 after 4 h | NP | ref13 |
|  | ZnSe Nanorods/ Ni-(BF4)2 co-catalyst | H2O/ ascorbic acid | 54 mmol gZnSe-1h-1 | 50% at 400 nm | ref14 |
|  | Tetraphenylethylene (TPE) Based CMP | H2O/ MeOH/ Na2S, Na2SO4 | 659.55 μmol g-1 h-1 | NP | ref15 |
|  | NCNCNx / NiP | Aq. K2HPO4/ 4-methyl benzyl alcohol | 0.061 μmol h-1 | NP | ref16 |
|  | C3N4 based gel (FD-CNB-G)/3 wt% Pt NP | H2O/ TEOA | 20 μmol | NP | ref17 |
|  | PTCDIs- C3N4 aggregates/ Pt NP | H2O/ TEOA | 3.8 μmol h-1 | 0.31 % at 420 nm | ref18 |
|  | nano-TiO2/ CdSe quantum dots/ Pt co-catalyst | H2O /EtOH | 16.7 mmol g-1 h-1 | NP | ref19 |
|  | Ir-complex (P1)/ Co(bpy)3Cl2 | H2O, Acetone/ TEOA | 598 μmol | 1.02% at 420 nm | ref20 |
|  | Cu-complex | H2O, THF/ TEA | 11.78 μmol g-1 h-1 | NP | ref21 |
|  | PBI-F gel/ 1 mol % PVP capped Pt | H2O/ MeOH | 3.0 μmol g-1 h-1 | 0.018% at 365 nm | ref22 |
|  | Ni (1%): TiO2 | H2O/ MeOH | 3390 μmol g-1 h-1 | 2.8 % | ref23 |

(* NP=Not Produced)

**S12. Photocatalytic CO2 reduction:**

**Experimental set-up for the photocatalytic CO2 reduction:** Thephotocatalytic CO2 reduction reaction was carried out in a similar reaction vessel as discussed above for the water reduction. Notably, a mixture of acetonitrile (MeCN) and water in 3:1 ratio was used as a solvent for the CO2 reduction. In short, 38 ml solvent mixture (MeCN: H2O in 3:1), 2 ml of TEA as a sacrificial electron donor and 1 mg of the catalyst was taken in a reaction flask and dispersed uniformly through sonication. The reaction vessel was sealed with a septum and then purged with CO2 of 99.9 % purity for ~30 min in order to make CO2 saturated atmosphere. The reaction mixture was irradiated with visible light as employed for water reduction. During the CO2 reduction reaction, the gas in the headspace of the reaction vessel was analyzed qualitatively and quantitatively by GCMS-QP2020. During light exposure, the evolved gases in the headspace of the reaction vessel were collected by hamilton syringe and injected in GC-MS at every one-hour time-interval until product production ceased. The mass detector was used to analyze the mass of evolved products such as CO, CH4, CH3OH, HCOOH and CO32-. The H2, CO, and CH4 were detected by RT®-Msieve 5A column (45 meters, 0.32 mmID, 30 μmdf). To detect the HCOOH, Stabilwax®-DA (30 meters, 0.18 mmID, 0.18 μmdf) column was used and for Methanol, SH®-Rxi-5Sil MS (30 meters, 0.25 mmID, 0.32 μmdf) column was used in GCMS. The calibration was done by a standard gas mixture of H2, CO, and CH4 of different concentrations in ppm-level. Importantly, the GCMS has a detection limit of 1.0 ppm for H2, CO, and CH4. After the photocatalysis, the reaction mixture was filtered to remove the residual solid and the solution was further analyzed to determine the amount of HCOOH/MeOH. All described data points are the average of at least 3 experiments.

**In situ Diffuse Reflectance Infrared Fourier Transform Spectroscopy (DRIFTs) measurements:** The in situ DRIFTs measurements were carried out by FT-IR spectrophotometer (BRUKER, Pat. US, 034, 944) within a photoreactor. The 6 mg of photocatalyst was evenly spread over a glass disc of 1 cm diameter and placed inside the photoreactor for monitoring reaction progress of photocatalytic CO2 reduction. Next, the vacuum was applied to remove the air inside the photoreactor and then 99.99 % CO2 gas along with water vapour was passed for 15 minutes inside the photoreactor. At last, the visible light was irradiated on catalyst by 150 W white LED light (> 400 nm). In situ FT-IR signal was collected through MCT detector at regular time interval.

**Effect on solvent composition variation:**


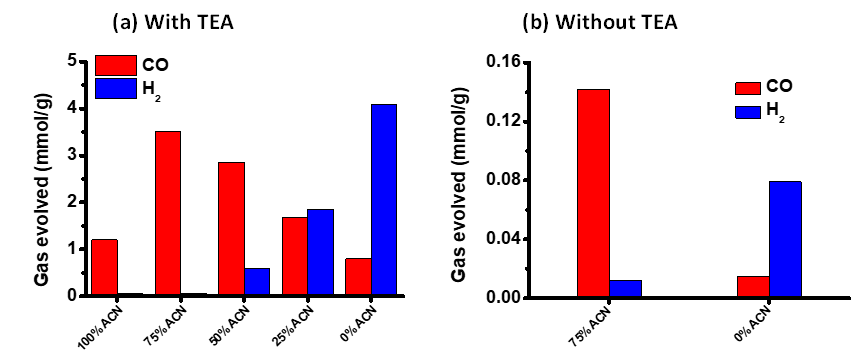


**Supplementary Figure 31.** Product distribution during the photocatalytic CO2 reduction using **Zn-TPY-TTF** **CPG** in a different composition of acetonitrile/water as solvent under CO2 atmosphere; 8 h visible light irradiation. (a) With TEA. (b) Without TEA.


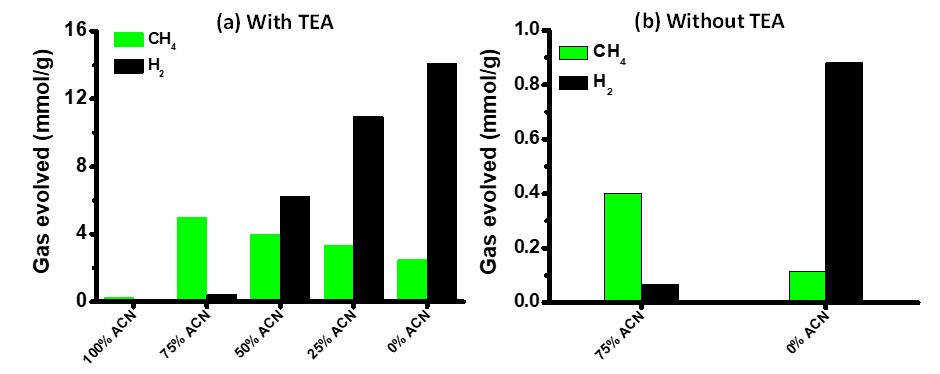


**Supplementary Figure 32.** Different composition of acetonitrile / water for CO2 reduction using **Pt@Zn-TPY-TTF** under visible light irradiation for 12 h. (a) With TEA. (b) Without TEA.

**S13. Isotopic labelling experiments**

**Supplementary Figure 33.** (a) Chromatogram and (b) Mass analysis for **12CO** as a product obtained from 12CO2 saturated sample using **Zn-TPY-TTF CPG** under visible light irradiation for 1 h (for this experiment 12CO2 gas was purged for 20 min in 10 ml solvent mixture of CH3CN: H2O containing 1 mg of catalyst and 0.5 ml TEA).

**Supplementary Figure 34.** (a) Chromatogram and (b) Mass analysis for **13CO** as a product obtained from 13CO2 saturated sample using **Zn-TPY-TTF CPG** under visible light irradiation for 1 h (for this experiment 13CO2 gas was purged for 10 min in 10 ml solvent mixture of CH3CN: H2O containing 1 mg of catalyst and 0.5 ml TEA).

**Supplementary Figure 35.** (a) Chromatogram and (b) Mass analysis for **12CH4** as a product obtained from 12CO2 saturated sample using **Pt@Zn-TPY-TTF CPG** under visible light irradiation for 1 h (for this experiment 12CO2 gas was purged for 10 min in 10 ml solvent mixture of CH3CN: H2O containing 1 mg of catalyst and 0.5 ml TEA).

**Supplementary Figure. 36.** (a) Chromatogram and (b) Mass analysis for **13CH4** as a product obtained from 13CO2 saturated sample using **Pt@Zn-TPY-TTF CPG** under visible light irradiation for 1 h (for this experiment 13CO2 gas was purged for 10 min in 10 ml solvent mixture of CH3CN: H2O containing 1 mg of catalyst and 0.5 ml TEA).

**S14. Quantum efficiency measurements for CO2 reduction products:**

The reduction of a CO2 molecule to the CO molecule requires two-electron (*n*=2). The following calculation is based on data from CO2 photoreduction with Zn-TPY-TTF CPG at 550 nm for 1h, Q.E. was calculated as 1.71%. Similarly, the reduction of a CO2 molecule to the CH4 molecule requires eight-electron (*n*=8). Further, we examined the quantum efficiency for CH4 formation by Pt@Zn-TTF-TPY CPG at various wavelengths (400-700 nm) and found that the maximum efficiency at 550 nm. Therefore, the following calculation is based on data from CO2 photoreduction with Pt@Zn-CPG for 1 h (at 550 nm) and the corresponding Q.E. was calculated as 0.81 %. Therefore, the quantum efficiency measurement confirms the charge transfer induced photocatalytic efficiency of Zn-TPY-TTF CPG, which enhances the absorption of visible light.

**Supplementary Figure 37.** Quantum efficiency for CH4 formation by **Pt@Zn-TPY-TTF** at a different wavelength (400 nm to 700 nm) (for this experiment 1 mg of sample was dispersed in CO2 saturated 12 ml solvent mixture of CH3CN: H2O in 3:1 ratio with TEA (0.6 ml) as sacrificial donor).

**S15. Control experiments and stability test for CO2 reduction:**

**
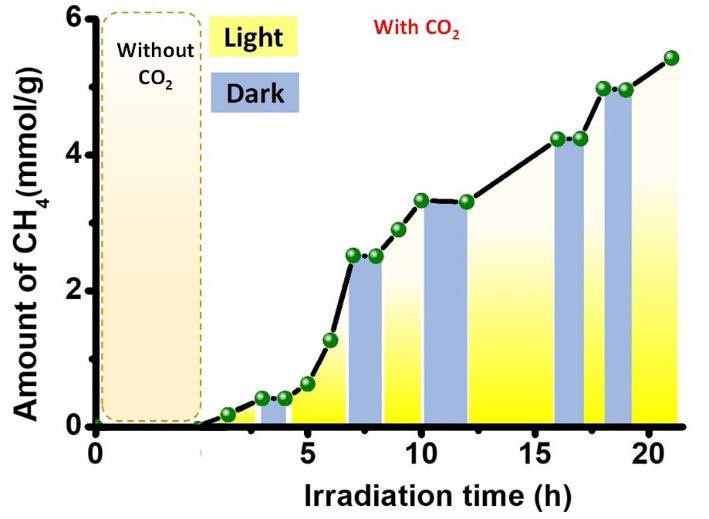
**

**Supplementary Figure 38.** Control experiment for visible light-driven CH4 formation during photocatalytic CO2 reduction by **Pt@Zn-TPY-TTF**.

**Supplementary Figure 39.** Stability test for **Zn-TPY-TTF** under visible light irradiation for CO2 reduction to CO. The reaction vessel was degassed by N2 after every 6 h. (b) Stability test for **Pt@Zn-TPY-TTF CPG** under visible light irradiation for CO2 reduction. The reaction vessel was degassed by N2 after every 6 h.


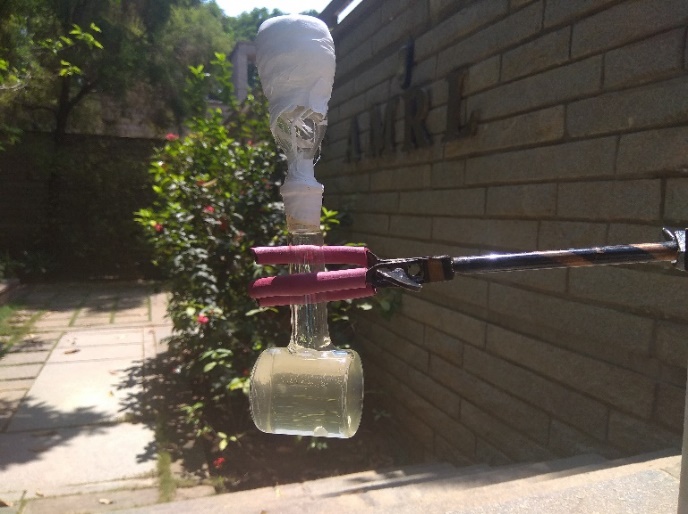


**Supplementary Figure 40.** A picture of an experimental set-up for sunlight driven photocatalytic experiments.

**Supplementary Figure 41.** (a) FESEM image, (b)TEM image and (c) EDAX analysis for **Zn-TPY-TTF** CPG after performing photocatalytic CO2 reduction experiment for 1 week.

**Supplementary Figure 42.** (a) FESEM image, (b) TEM image and (c) EDAX analysis for **Pt@Zn-TPY-TTF** CPG after photocatalytic CO2 reduction experiment for 1 week.

**S16. Comparison Table for CO2 reduction:**

**Table 6. Comparison table for the activity of TPY-TTF, Zn-TPY-TTF and Pt@Zn-TPY-TTF towards the photocatalytic CO2 reduction under visible light irradiation (420-750 nm).**

| **Catalyst** | **Reaction medium** | **Selectivity of CO2 reduction and amount of product** | **Irradiation Time (h)** | **Activity (μmol g-1 h-1)** | **TON** |
| --- | --- | --- | --- | --- | --- |
| TPY-TTF | CH3CN: H2O (3:1) + TEA | 99 % CO,  1.12 mmol/g | 11 h | 140 μmol g-1 h-1 | 2.1 in 11 h |
| Zn-TPY-TTF (1:2) | CH3CN: H2O (3:1) + TEA | 99 % CO,  3.51 mmol/g | 8 h | 438 μmol g-1 h-1 | 7.8 in  8 h |
| Pt@Zn-TPY-TTF | CH3CN: H2O (3:1) + TEA | 97 % CH4, 8.74 mmol/g | 30 h | 292 μmol g-1 h-1 | 19.4 in 30 h |
| Zn-TPY-TTF (1:2) | CH3CN: H2O (3:1) | 92 % CO,  0.14 mmol/g | 8 h | 18 μmol g-1 h-1 | 0.3 in  12 h |
| Zn-TPY-TTF (1:2) | H2O | 16 % CO,  0.01 mmol/g | 8 h | 2 μmol g-1 h-1 | 0.03 in  12 h |
| Pt@Zn-TPY-TTF | CH3CN: H2O (3:1) | 86 % CH4, 0.40 mmol/g | 12 h | 33 μmol g-1 h-1 | 0.9 in  12 h |
| Pt@Zn-TPY-TTF | H2O | 11 % CH4, 0.11 mmol/g | 12 h | 9 μmol g-1 h-1 | 0.2 in  12 h |

**Table 7. Photocatalytic CO2 reduction activity of TPY-TTF, Zn-TPY-TTF and Pt@Zn-TPY-TTF under sunlight irradiation.**

| **Catalyst** | **Amount of CO2 reduction Product(mmol/g)** | **Irradiation Time (h)** | **Rate (μmol g-1 h-1)** | **TON** |
| --- | --- | --- | --- | --- |
| Zn-TPY-TTF (1:2) | 1.79 mmol/g on 30th sept | 6 h | 298 μmol g-1 h-1 | 3.9 in 6 h |
| Pt@Zn-TPY-TTF | 0.96 mmol/g on 1st Oct | 6 h | 160 μmol g-1 h-1 | 2.1 in 6 h |

**Table 8. Comparison table of visible light driven photocatalytic CO2 reduction of Zn-TPY-TTF and Pt@Zn-TPY-TTF with some of the reported benchmark hybrid materials reported in the literature.**

| **S.N.** | **catalyst** | **reaction medium** | **activity for CH4** | **activity for CO** | **activity for H2** | **QY** | **ref** |
| --- | --- | --- | --- | --- | --- | --- | --- |
|  | **Zn-TPY_TTF** | **CO2/ H2O, CH3CN/ TEA** | **--** | **438 μmol g-1 h-1** | **--** | **at 550 nm=1.71 %** | **This work** |
|  | **Pt@Zn-TPY-TTF** | **CO2/ H2O, CH3CN/ TEA** | **292 μmol g-1 h-1** | **--** | **>3%** | **at 550 nm=0.81 %** | **This work** |
|  | (CoPPc)/ (mpg-CNx) | CO2/CH3CN/ TEOA | -- | 450 μmol g-1 in 24 hr | -- | 0.03% at 400 nm | ref24 |
|  | Zn-Porphyrin-TTF-COF (TTCOF-Zn) | CO2/ H2O | -- | 123.3 μmol g-1 >60 h | -- | 0.00027 % at 450 nm | ref25 |
|  | TRP | CO2/ H2O Vapour | 8.4 μmol g-1 h-1 | 488.8 μmol g-1 h-1 | -- | 6.7 % at 420 nm | ref26 |
|  | Zn0.4Ca0.6In2S4 | CO2 | 0.877 μmol g-1 h-1 | 0.224 μmol g-1 h-1 | -- | NP | ref27 |
|  | 2,2′-bipyridine-based COF/ Ni-TpBpy, PS: Ru(bpy)3]Cl2 | CO2/H2O/ TEOA | -- | 811 μmol g−1 h-1 | 34 μmol g−1 h-1 | 0.3 % at 420 nm | ref28 |
|  | (CsPbBr3 QD/GO) composite | CO2/ Ethyl acetate | 29.6 μmol g-1 | 58.7 μmol g-1 | 1.58 μmol g-1 | ~ 0.022 % at 450 nm | ref29 |
|  | COF/ [Re(bpy)(CO)3Cl] + Dye as PS: (Ir[dF(CF3)ppy]2(dtbpy))PF6 | CO2/ H2O/ TEOA | -- | 1400 μmol g-1 h-1 | > 14 % | 0.5% at 420 nm | ref30 |
|  | NiCoOP NPs/ [Ru(bpy)3]Cl2·6H2O | CO2/CH3CN/ TEOA | -- | 16.6 μmol h-1 | -- | NP | ref31 |
|  | Coqpy@mpg-C3N4 | CH3CN /BIH/ PhOH | -- | 1.15 μmol | 0.06 μmol | 0.25% | ref32 |
|  | CN-ATZ-NaK | CO2 | 1 μmol g-1 h-1 | 14 μmol g-1 h-1 | -- | NP | ref10 |
|  | COF-367 + PS: [Ru(bpy)3] Cl2 | CO2/0.1 M KHCO3 /ascorbic acid | -- | 10162 μmol g-1 h-1 | 2875 μmol g-1 h-1 | NP | ref33 |
|  | Ni-Complex PS: [Ru(bpy)3] Cl2 | CO2/DMA, H2O/ BIH | -- | 0.17 μmol min−1 | 0.0473 μmol | 11.1 % at 450 nm | ref34 |
|  | 2D-triazine-COF-Re-complex | CO2/CH3CN/TEOA | -- | 15 mmol/g >20 h | 2% H2 | NP | ref35 |
|  | Ni(II) complex  PS: [Ru(bpy)3] Cl2 | CO2/ DMA, H2O/ BIH | -- | ~90 μmol in >50 h | >1% H2 | 1.42 % | ref36 |
|  | ZnPd-TiO2 nanotube arrays (TNAs) | CO2 | 26.83 μmol g–1 h–1 | -- | -- | NP | ref37 |
|  | g-CN/ Ni Nanoparticles | gas-phase CO2 methanation at (150 °C) | 28 μmol g-1 h-1 | -- | -- | 0.01 % | ref38 |
|  | Ru2-Mn / [MnBr(CO)3 (BL)], [Ru(dmb)2 (BL)]2+ | CO2/DMA/ TEOA/ BIH | -- | 3.5 μmol | 0.10 μmol | 0.43% | ref39 |
|  | 1 % Pt/In2O3 | CO2 + H2 | 21.0 μmol g-1 | 8.6 μmol g-1 | -- | NP | ref40 |
|  | (HUY@S-TOH/AuPd) | CO2/ H2O | 126 μmol g-1 | 8 μmol g-1 | 37 μmol g-1 | NP | ref41 |
|  | Ni(terpy-S)2/CdS | CO2/ DMF/ TEOA | -- | ~1 μmol in 4 hr | ~ 0.1 μmol in 4 hr | At 400 nm=0.28 % | ref42 |
|  | Pt 3wt %/ ZnIn2S4@CNO | CO2/ CH3CN, H2O/ TEOA | 1.18 μmol h‒1 | 12.69 μmol h‒1 | 188.4 μmol h‒1 | NP | ref43 |
|  | In−Fen TCPP-MOF | CO2/ L-ascorbgyl palmitate/ ethyl acetate | -- | 3469 μmol g-1 in 24 hr | -- | NP | ref44 |
| 25. | 20% Mt/m-CN | CO2/ H2 | 345 μmol g-1 h-1 | 291 μmol g-1 h-1 | -- | 4.55 % for CH4 and  0.96 for CO | ref45 |
| 26. | Pd-g-C3N4/RGO | CO2 | 6.4 μmol g-1 h-1 | -- | -- | NP | ref46 |
| 27. | CsPbBr3 /Cu-RGO | CO2/ H2O (g) | 12.7 | 0.46 | 0.27 | 1.1 % at 523 nm | ref47 |
| 28. | Ptn/3 DOM-SrTiO3 | CO2/ H2O | 27.7 μmol g-1 h-1 | 4.1 μmol g-1 h-1 | -- | CO2 +CH4 = 0.66% | ref48 |
| 29. | OD/1D Au/TiO2 | CO2/ H2O | 70.34 μmol g-1 h-1 | 19.75 μmol g-1 h-1 | -- | NP | ref49 |
| 30. | CsPbBr3-Re(CO)3Br(dcbpy) composite | CO2/ Toluene/ IPA | -- | 104.37 μmol g-1 in 3 hr | 5.64 μmol g-1 in 3 hr | NP | ref50 |
| 31. | Mo/g-C3N4 hybrids | CO2/ H2O | 3.8 μmol g-1 h-1 | -- | -- | NP | ref51 |
| 32. | CsPbBr3/ MXene nano-composites | CO2/ Ethyl acetate | 14.16 μmol g-1 h-1 | 32.15 μmol g-1 h-1 | -- | NP | ref52 |
| 33. | UIO-66-NH2/2.0GR hybrid | CO2/ DMF, H2O/ TEOA | 0.90 μmol in 4 h | 13.2 μmol in 4 h | -- | NP | ref53 |
| 34. | fac-[Mn(phen)(CO)3Br], PS: Zn-Porphyrin | CO2/ CH3CN, H2O/ TEA | -- | TON 64 in 3 h | -- | NP | ref54 |
| 35. | Co-ZIF-9 MOF/ CdS | Bipyridine, CH3CN, H2O/ TEOA | -- | 50.4 μmol h‒1 | 11.1 μmol h‒1 | NP | ref55 |

**S17. DFT calculations for CO2 reduction mechanism:**

**Computational details:** All electronic structure calculations are performed under the framework of Density Functional Theory. The molecular geometries are optimized using B3LYP-D356-61 exchange-correlation functional. For geometry optimization 6-31G(d,p) basis set is used for all atoms except for Zn atom, for which LANL2DZ, which uses a widely used effective core potential (ECP)- type basis set, is used.62-63 The optimized structures were subjected to harmonic vibrational frequency analysis to confirm the nature of the stationary points. Then, the optical properties were calculated using time-dependent density functional theory (TD-DFT) methods with long-range corrected CAM-B3LYP64 exchange-correlation functional along with a different functional wB97XD65-66. For TD-DFT calculations, 6-31+G(d,p) basis set was used for all atoms except Zn, as previously mentioned. Solvent effects were taken into account using PCM model with the integral equation formalism variant.67 However, for mechanistic studies the electronic energies are further refined with single point energy calculations using a higher basis set 6-311++g(d,p) for the lighter atoms. Transition states are further verified by intrinsic reaction coordinate (IRC) calculations by checking their connection to two respective minimum structures. All thermochemical data are obtained with the ideal gas-rigid rotor-simple harmonic oscillator approximations at 298.15 K and 1 atm. Zero point-energy corrections are included in the Gibbs free energy values along with a concentration correction for c = 1 mol/ dm3 condition in the solvent. All calculations were performed using Gaussian 16 package.68

(a) (b)

**Supplementary Figure 43.** Spin-density distribution of (a) **[Zn(TPY.-)( TPY)]1+** and (b) **[Zn(TPY.-)(MeCN)2]1+**. (Isovalue = 0.002).

**Supplementary Figure 44.** Optimized geometries of **(a) [Zn(TPY)]2+, (b) [Zn(TPY.-)(MeCN)2]1+, (c) Transition state (TS), (d) [Zn(TPY)(MeCN)2(CO2-)]1+, (e) [Zn(TPY.-)(MeCN)2(CO2-)], (f) [Zn(TPY.)(MeCN)2(CO2-)(CO2], (g) [Zn(TPY)(MeCN)2(CO)]2+**.

**Cartesian coordinates of the computed structures**

B3LYP/6-31g(d,p) optimized structures are given in standard XYZ format

**CO2**

**Charge 0 multiplicity 1**

C 0.00000000 0.00000000 0.00000000

O 0.00000000 0.00000000 1.16971600

O 0.00000000 0.00000000 -1.16971600

**CO**

**Charge 0 multiplicity 1**

C 0.00000000 0.00000000 -0.65013500

O 0.00000000 0.00000000 0.48760100

**Acetonitrile**

**Charge 0 multiplicity 1**

C 0.00000000 0.00000000 -1.18103800

H 0.00000000 1.02636400 -1.55947900

H 0.88885800 -0.51318200 -1.55947900

H -0.88885800 -0.51318200 -1.55947900

C 0.00000000 0.00000000 0.28022700

N 0.00000000 0.00000000 1.44047200

**[Zn(TPY)]2+**

**Charge 2 multiplicity 1**

C 4.92010678 0.04436090 0.28531671

C 4.13251273 0.89424675 1.10725492

C 2.75354560 0.86677599 0.99676345

C 2.84974656 -0.76976573 -0.67038605

C 4.23619624 -0.80436942 -0.62271431

H 4.62609896 1.55367761 1.81127430

H 4.79661204 -1.46742255 -1.26597225

C 2.03440528 -1.62153478 -1.58969604

C 2.58798126 -2.53326829 -2.49353651

C 1.74237669 -3.28333950 -3.31025461

H 3.66052643 -2.66385320 -2.56755091

C -0.11393945 -2.18091073 -2.28469964

C 0.36285479 -3.10828898 -3.20846684

H 2.15841967 -3.99468095 -4.01636968

H -1.17768352 -1.99954076 -2.15906190

H -0.32679872 -3.67256482 -3.82594681

C 1.83701218 1.71899280 1.81351200

C 2.28140082 2.63474051 2.77209374

C -0.37797250 2.27598457 2.25531600

C 1.34629207 3.38512761 3.48387353

H 3.33817863 2.76843427 2.96795699

C -0.01226969 3.20667682 3.22490337

H -1.41984414 2.09204628 2.00854703

H 1.67715985 4.09958253 4.23071720

H -0.76928926 3.77126715 3.75730883

N 0.51741231 1.55385494 1.57001410

N 2.12880733 0.04772437 0.12207743

N 0.69514785 -1.45942004 -1.49925032

N 6.26570819 0.05572426 0.37674556

H 6.68515662 0.68405531 1.04575825

C 7.16139328 -0.77431610 -0.41880312

H 8.18899697 -0.55082478 -0.13285979

H 6.97991618 -1.84010703 -0.23994780

H 7.05059351 -0.56608895 -1.48891046

C -4.92038122 0.04839704 -0.28102050

C -4.13370254 0.91404244 -1.08725104

C -2.75460268 0.88411156 -0.97921556

C -2.84890533 -0.78501468 0.65542353

C -4.23544760 -0.81809671 0.60926039

H -4.62807112 1.58747636 -1.77732594

H -4.79518878 -1.49294598 1.24072176

C -2.03252847 -1.65514511 1.55642117

C -2.58491056 -2.58678893 2.44048514

C -1.73834668 -3.35301565 3.24106031

H -3.65726822 -2.72060612 2.51137421

C 0.11653844 -2.22667957 2.23917803

C -0.35904917 -3.17405540 3.14305964

H -2.15347128 -4.07986776 3.93175089

H 1.18005341 -2.04144839 2.11726910

H 0.33135384 -3.75046857 3.74837345

C -1.83897404 1.75240118 -1.77990137

C -2.28429853 2.68550168 -2.72115215

C 0.37546129 2.31980830 -2.21113503

C -1.34993515 3.45011277 -3.41863767

H -3.34120320 2.82162766 -2.91464959

C 0.00880672 3.26829086 -3.16296489

H 1.41750229 2.13232583 -1.96780242

H -1.68151573 4.17808635 -4.15199041

H 0.76522967 3.84362903 -3.68460461

N -0.51922031 1.58393361 -1.53967064

N -2.12885044 0.04778451 -0.12176842

N -0.69346600 -1.48957434 1.46933515

N -6.26610137 0.06185793 -0.37035650

H -6.68637219 0.70470090 -1.02490672

C -7.16093057 -0.78295116 0.41046501

H -8.18875233 -0.55564315 0.12833701

H -6.97830256 -1.84517258 0.21267298

H -7.05040740 -0.59369147 1.48414249

Zn -0.00001038 0.04775450 0.00015002

**[Zn(TPY.-)(TPY)]1+**

**Charge 1 multiplicity 2**

C 4.90542859 0.15890891 0.31130739

C 4.09179852 1.02358894 1.10241318

C 2.71570981 0.93768207 0.98805662

C 2.86352400 -0.77950819 -0.60968984

C 4.26806480 -0.74664006 -0.54915192

H 4.56282840 1.72909841 1.77648613

H 4.85492073 -1.41122728 -1.16763603

C 2.09351351 -1.68945124 -1.45627656

C 2.66704238 -2.70446930 -2.24985226

C 1.85512678 -3.52003661 -3.01934219

H 3.74044065 -2.85543485 -2.25305702

C -0.04187609 -2.32294713 -2.18125940

C 0.45998963 -3.32839769 -2.99475233

H 2.29229291 -4.30300310 -3.63085248

H -1.11040768 -2.13497099 -2.10761318

H -0.20838697 -3.94431480 -3.58509592

C 1.76900700 1.78847269 1.77185684

C 2.17725446 2.76285282 2.69014602

C -0.46555446 2.26461143 2.20696437

C 1.21336446 3.49810368 3.37716509

H 3.22893198 2.94771910 2.87176253

C -0.13804682 3.24857132 3.13666902

H -1.49785833 2.01931065 1.97208125

H 1.51581728 4.25610993 4.09290977

H -0.91696163 3.79786612 3.65361673

N 0.45836417 1.55929903 1.54549818

N 2.11772879 0.06518023 0.15461839

N 0.73272165 -1.52177902 -1.43491452

N 6.26191065 0.23988372 0.40757377

H 6.64629172 0.88932166 1.07440667

C 7.18234632 -0.61101783 -0.32145401

H 8.20363984 -0.34244036 -0.04852647

H 7.03001281 -1.67159753 -0.08252010

H 7.07375751 -0.48131438 -1.40551534

C -4.90544179 0.15879409 -0.31079099

C -4.09193495 1.02352787 -1.10196323

C -2.71582291 0.93753261 -0.98791106

C -2.86339525 -0.77981342 0.60970066

C -4.26794988 -0.74689140 0.54942705

H -4.56307148 1.72920211 -1.77578784

H -4.85471290 -1.41151406 1.16796025

C -2.09326675 -1.68984870 1.45606935

C -2.66668656 -2.70510071 2.24942864

C -1.85467729 -3.52077320 3.01870814

H -3.74006860 -2.85617939 2.25261232

C 0.04219669 -2.32332570 2.18084915

C -0.45956007 -3.32900745 2.99412780

H -2.29175976 -4.30392267 3.63004458

H 1.11070913 -2.13522869 2.10723588

H 0.20888641 -3.94500299 3.58431018

C -1.76923571 1.78835013 -1.77181900

C -2.17762377 2.76252538 -2.69026571

C 0.46525619 2.26473729 -2.20701098

C -1.21384165 3.49782781 -3.37737888

H -3.22932763 2.94716749 -2.87195564

C 0.13760616 3.24853707 -3.13683397

H 1.49759561 2.01961696 -1.97209619

H -1.51640281 4.25568072 -4.09324002

H 0.91644212 3.79788334 -3.65384581

N -0.45855743 1.55938504 -1.54544044

N -2.11771683 0.06491926 -0.15468041

N -0.73248631 -1.52205319 1.43471264

N -6.26194399 0.23991030 -0.40670696

H -6.64640555 0.88905920 -1.07377685

C -7.18225747 -0.61126449 0.32216087

H -8.20360004 -0.34249718 0.04960340

H -7.03005075 -1.67176619 0.08277964

H -7.07339650 -0.48198636 1.40624023

Zn -0.00002163 -0.05052128 -0.00003141

**[Zn(TPY.-)(MeCN)2]1+**

**Charge** 1 **multiplicity** 2

C -1.32234683 1.55141419 0.00948684

C -1.80592681 -0.77555181 0.01205647

C -2.66567117 1.86912809 0.01839098

C -3.17950140 -0.50602843 0.01531712

C -3.63374220 0.82385499 0.02422732

H -2.99964311 2.90086652 0.02670020

H -3.89183683 -1.32002662 0.01092523

C -0.22094102 2.53185750 0.00056232

C -0.40438414 3.92230670 0.00115503

C 0.69592233 4.76801557 -0.00767900

H -1.40551089 4.33711154 0.00887709

C 2.10171535 2.83083316 -0.01682499

C 1.98666139 4.21033330 -0.01706751

H 0.55896183 5.84435789 -0.00717024

H 3.07562140 2.34800716 -0.02367770

H 2.87317485 4.83434679 -0.02405766

C -1.20068831 -2.09368907 0.00576792

C -1.92621412 -3.30510997 0.01121095

C -1.26511581 -4.51650774 0.00386614

H -3.01017382 -3.28148991 0.02200022

C 0.81163451 -3.31950315 -0.01220358

C 0.15124790 -4.53068192 -0.00862830

H -1.82484691 -5.44606370 0.00809942

H 1.89854649 -3.27537062 -0.02095565

H 0.70844938 -5.46035137 -0.01465205

N -4.96888007 1.14253722 0.06253398

N 1.04122640 1.99862679 -0.00828333

N -0.90646082 0.25778003 0.00883626

N 0.18565913 -2.12175016 -0.00532222

N 2.46796280 -0.44402759 -1.65199403

N 2.45450572 -0.43895398 1.66048455

H -5.20917219 2.09989413 -0.14125815

C 2.95990572 -0.60039841 2.68872179

C 2.98913849 -0.61040427 -2.67152001

C 3.58938075 -0.80435891 3.98530749

H 4.65344661 -1.02017133 3.85363018

H 3.47802673 0.09665385 4.59528922

H 3.11264960 -1.64540538 4.49705672

C 3.63860016 -0.82047699 -3.95723124

H 4.69954024 -1.04009260 -3.80778073

H 3.16690973 -1.66110158 -4.47431608

H 3.54074277 0.07922908 -4.57144313

Zn 1.06481814 -0.18534812 -0.00184632

C -6.02371892 0.15875015 -0.08493778

H -6.00315965 -0.56094985 0.74177606

H -6.98811292 0.66830245 -0.05735702

H -5.95198487 -0.39948700 -1.02995040

**TS**

**Charge** 1 **multiplicity** 2

C -3.97863000 0.74020500 -0.04519800

C -3.05214700 1.80516800 0.09612400

C -1.69402700 1.54077000 0.03397200

C -2.08964700 -0.75555200 -0.27480500

C -3.46711800 -0.56595300 -0.22472900

H -3.42141700 2.81345900 0.24601400

H -4.14321100 -1.40327200 -0.32723900

C -1.42789700 -2.06999700 -0.43192700

C -2.11552300 -3.29123700 -0.46931500

C -1.40678300 -4.47528200 -0.63077700

H -3.19435300 -3.31651900 -0.37009000

C 0.61124500 -3.18772500 -0.67131700

C -0.00955900 -4.42682200 -0.74290900

H -1.93088600 -5.42489600 -0.66382400

H 1.69230700 -3.08993900 -0.72099100

H 0.57963000 -5.32700300 -0.87605800

C -0.62678800 2.56054000 0.18407800

C -0.87186800 3.90905900 0.47378400

C 1.67414600 2.96482300 0.13150900

C 0.19500700 4.79470200 0.57444600

H -1.88510300 4.26441600 0.61960400

C 1.49930100 4.31760300 0.39183000

H 2.66164700 2.52969100 0.00675000

H 0.01554400 5.84185300 0.79551700

H 2.35763600 4.97652400 0.45782400

N 0.64677800 2.10518900 0.02647400

N -1.23660400 0.28544600 -0.16884100

N -0.06715700 -2.03698300 -0.52768300

N -5.31581200 0.98692900 0.00045200

H -5.61141000 1.94257100 0.11976900

C -6.34322100 -0.02808200 -0.14269300

H -7.32102800 0.44954800 -0.07188200

H -6.27949100 -0.53337400 -1.11464300

H -6.27558600 -0.78408000 0.64953800

Zn 0.80309900 -0.08365200 -0.08245000

C 3.73800200 -0.51349000 0.47188400

O 3.67672900 -1.59705200 0.95656000

O 4.17967400 0.50121600 0.03622100

C 3.98701500 0.64518100 -3.39438500

H 4.82226500 0.73467100 -2.69000400

H 4.20904100 -0.13668600 -4.12587600

H 3.85168000 1.59526500 -3.91851800

C 2.78933800 0.30781100 -2.64311200

N 1.89396500 0.02982500 -1.95909800

C 2.30536200 -1.95967400 3.89810800

H 3.25599000 -2.21159700 3.41534900

H 1.77588000 -2.88031200 4.15827800

H 2.49897100 -1.39025900 4.81136100

C 1.51218700 -1.17022800 2.96862100

N 0.93987800 -0.54536700 2.17315700

**[Zn(TPY)(MeCN)2(CO2-)]1+**

**Charge** 1 **multiplicity** 2

C -3.89428978 0.75340460 -0.03696335

C -2.95570988 1.80491053 -0.19224322

C -1.60099198 1.51481578 -0.17446382

C -2.01827323 -0.76101844 0.13677203

C -3.39364749 -0.56014078 0.13107430

H -3.31237104 2.82033875 -0.32067138

H -4.07621596 -1.38957763 0.24950050

C -1.37004818 -2.09905273 0.29560251

C -2.08072311 -3.28706518 0.48363394

C -1.37938115 -4.48665234 0.60596938

H -3.16270447 -3.28584768 0.53600855

C 0.65596180 -3.25358679 0.34616774

C 0.01216639 -4.47641533 0.53306571

H -1.91797880 -5.41727651 0.75435089

H 1.73619199 -3.16562101 0.26898219

H 0.59067529 -5.38930875 0.61921726

C -0.51907157 2.53591403 -0.31851127

C -0.75994250 3.89881790 -0.50956979

C 1.78512415 2.89747184 -0.33861371

C 0.32246866 4.77176225 -0.61771801

H -1.77138898 4.28132324 -0.57448081

C 1.61911412 4.26885700 -0.52793941

H 2.76289749 2.43231148 -0.24835233

H 0.15070467 5.83290862 -0.76815193

H 2.48467772 4.91741977 -0.60290998

N 0.74409622 2.06138957 -0.24334441

N -1.15747881 0.25583804 -0.01264651

N -0.01978860 -2.10351492 0.23741511

N -5.22414359 1.01492466 -0.05131993

H -5.51113927 1.97292647 -0.17731763

C -6.26429518 0.01101453 0.09995748

H -7.23571845 0.50362796 0.05105526

H -6.21965384 -0.73690637 -0.70079203

H -6.18926113 -0.50145036 1.06652125

Zn 0.93216514 -0.12497371 0.00079789

C 3.21310878 -0.54106943 0.01585374

O 3.42914669 -1.66711072 -0.42953725

O 3.80966775 0.43537432 0.46688326

C 2.88019745 -1.87998049 -3.60428330

H 3.30979838 -1.28818162 -4.41691780

H 3.65420163 -2.11623042 -2.86567572

H 2.46459917 -2.80523166 -4.01207012

C 1.85154358 -1.12143518 -2.91186007

N 1.07843915 -0.51610893 -2.29341881

C 2.10817464 0.48553011 2.92787772

C 3.32885410 0.83350359 3.63626352

H 4.14606592 0.78128597 2.90834394

H 3.26057564 1.84618570 4.04236715

H 3.51162938 0.12894154 4.45193914

N 1.17986241 0.19089334 2.29701685

**[Zn(TPY.-)(MeCN)2(CO2-)]**

**Charge** 0 **multiplicity** 1

C -3.90187301 0.30795179 0.30426171

C -3.16210527 1.49258639 0.08511704

C -1.77993054 1.42393370 -0.01622913

C -1.80171801 -0.88543238 0.30050271

C -3.18914587 -0.90368931 0.41725203

H -3.68092171 2.44282428 0.01900235

H -3.71012812 -1.83085585 0.61289768

C -0.95157369 -2.10312208 0.40402349

C -1.44597295 -3.40951217 0.34530969

C -0.54680941 -4.47220751 0.41792243

H -2.50561833 -3.59871912 0.21705690

C 1.24053845 -2.87926830 0.55773805

C 0.82031623 -4.20856788 0.52455920

H -0.90986866 -5.49466963 0.37276318

H 2.28728580 -2.57887492 0.56400313

H 1.54817823 -5.01175662 0.56852569

C -0.90169954 2.60903094 -0.23700599

C -1.36746964 3.89508243 -0.52815523

C 1.31817633 3.32566339 -0.34866507

C -0.43830198 4.91908781 -0.71212924

H -2.42841073 4.09871935 -0.62005854

C 0.92555512 4.63640769 -0.62295822

H 2.35510584 2.99039498 -0.29888012

H -0.77937010 5.92617489 -0.93342015

H 1.67221435 5.40944802 -0.76923359

N 0.41878925 2.35364620 -0.15217693

N -1.12341624 0.25285525 0.08500152

N 0.37024419 -1.86292041 0.51616088

N -5.26115730 0.35827969 0.41987163

H -5.70689812 1.24874431 0.27100259

C -6.10695062 -0.80654098 0.58371659

H -7.14887898 -0.48392990 0.61550798

H -5.99204984 -1.51636612 -0.24641147

H -5.88723713 -1.33339505 1.52084252

Zn 1.05842480 0.19287869 -0.13347657

C 3.13380025 0.12083503 -0.42665443

O 3.67448738 -1.02624830 -0.39634121

O 3.69141802 1.24109486 -0.32441022

C 2.15867754 -2.33420539 -2.80029720

H 2.63630808 -1.96770909 -3.71353517

H 2.70671731 -1.93239555 -1.92952504

H 2.20166429 -3.42755281 -2.79132336

C 0.76877013 -1.89479823 -2.75840953

N -0.33814741 -1.54420586 -2.70272232

C 2.70867711 0.47626853 2.59507743

C 4.15449417 0.31226369 2.51927810

H 4.57480284 1.17664562 1.99968152

H 4.58798691 0.18876096 3.51502847

H 4.36164604 -0.55469342 1.88140903

N 1.55150980 0.58712648 2.58950072

**[Zn(TPY.-)(MeCN)2(CO2-)( CO2 ) ]**

**Charge** 0 **multiplicity** 1

C -2.51520140 1.11916010 -0.11374640

C -2.21157878 -1.18967936 -0.02907959

C -3.89418742 0.97961771 -0.16280147

C -3.58419401 -1.41889904 -0.07828809

C -4.46130068 -0.31599818 -0.15299847

H -4.54352026 1.84672359 -0.21044015

H -3.97422249 -2.42693344 -0.06723231

C -1.81343751 2.43896516 -0.08316738

C -2.46034807 3.67634745 -0.03155336

C -1.68462540 4.83491748 0.03880146

H -3.54204469 3.74581979 -0.03531063

C 0.28230300 3.46299579 0.01082349

C -0.29485261 4.73399553 0.06814657

H -2.16735961 5.80677985 0.08037466

H 1.35706600 3.28203999 0.05554136

H 0.33412996 5.61465846 0.13754671

C -1.19868874 -2.28281984 0.07791088

C -1.52173647 -3.62467339 0.29626788

C -0.48822736 -4.55497121 0.41053731

H -2.55278032 -3.94365260 0.39463764

C 1.07885957 -2.76900949 0.09889349

C 0.83385755 -4.12663676 0.31215543

H -0.71824986 -5.60180686 0.58473965

H 2.07728900 -2.34135273 0.03131603

H 1.66232843 -4.81997696 0.40640457

N -5.81254302 -0.47452567 -0.21244029

N -0.47054891 2.36049716 -0.07414143

N -1.70013063 0.04962660 -0.06169160

N 0.08283915 -1.88629743 -0.02035415

N 0.78148801 0.01343599 -2.52392321

N 0.39724473 -0.44878327 2.78626527

H -6.37841194 0.35745763 -0.25449663

C 2.46120981 0.72519678 0.13740089

O 3.00365977 1.79364066 0.43516972

O 3.15648294 -0.40166036 -0.08424437

C 1.51291529 -0.19188212 2.99345560

C 1.85944387 -0.14551910 -2.93096076

C 2.91170120 0.15201436 3.21303049

H 3.57145650 -0.44589672 2.56763790

H 3.06867756 1.19204181 2.91400828

H 3.17658240 0.01299468 4.26488895

C 3.22983495 -0.32043745 -3.37675867

H 3.91318623 -0.23436754 -2.50616615

H 3.35096110 -1.30776047 -3.83201568

H 3.48162692 0.44747677 -4.11383516

C 4.77565459 -0.36385009 0.02353201

O 5.26245901 -0.16003047 -1.08159003

O 5.14012486 -0.62746663 1.15688971

Zn 0.46738753 0.31061885 -0.16475473

C -6.48743753 -1.75763882 -0.19216527

H -6.27312688 -2.31331799 0.72966100

H -7.56406558 -1.58967099 -0.24500733

H -6.19710322 -2.38002566 -1.04801760

**[Zn(TPY)(MeCN)2(CO)]2+**

**Charge** 2 **multiplicity** 1

C 3.56310497 1.13874230 -0.00061575

C 2.50125673 2.08601379 -0.00056500

C 1.19228894 1.64024258 -0.00031333

C 1.87923326 -0.59974119 -0.00008493

C 3.21843844 -0.23985992 -0.00035919

H 2.73700089 3.14357480 -0.00077577

H 3.99698486 -0.98908506 -0.00044189

C 1.38717649 -2.01186471 0.00021024

C 2.23936974 -3.11898258 0.00053946

C 1.69810476 -4.40407396 0.00083185

H 3.31447373 -2.98928617 0.00059524

C -0.47559664 -3.41222001 0.00042662

C 0.31272727 -4.55960662 0.00076165

H 2.35169159 -5.27037961 0.00112157

H -1.55972730 -3.47970275 0.00034417

H -0.14889952 -5.54047394 0.00098639

C -0.00713008 2.53210098 -0.00040924

C 0.07622224 3.92688057 -0.00050730

C -2.33493589 2.64489781 -0.00078148

C -1.09314802 4.68607871 -0.00077170

H 1.03863590 4.42342107 -0.00036975

C -2.32699690 4.03671752 -0.00094938

H -3.26982606 2.09184333 -0.00091573

H -1.03885147 5.76992065 -0.00085771

H -3.25973793 4.58915141 -0.00122918

N -1.21331964 1.90871498 -0.00049183

N 0.90202607 0.32365798 -0.00006768

N 0.03899285 -2.17352246 0.00017485

N 4.84579817 1.55049788 -0.00091422

H 5.01954778 2.54482996 -0.00109739

C 6.00642462 0.66741521 -0.00112606

H 6.90838856 1.27891118 -0.00142664

H 6.02246329 0.03319382 0.89214626

H 6.02199031 0.03300673 -0.89427330

Zn -1.07794533 -0.28258790 0.00011345

C -3.54852127 -1.04246714 0.00103689

C -1.90087444 -0.52937797 4.74273177

H -2.17866425 0.45966622 5.11897013

H -2.70011301 -1.23933095 4.97584099

H -0.97841741 -0.85432899 5.23303342

C -1.69831913 -0.47001722 3.30257256

N -1.53978590 -0.42358928 2.15632725

C -1.70019496 -0.47244917 -3.30178423

C -1.90348225 -0.53330558 -4.74177415

H -1.70273734 0.44621981 -5.18578001

H -1.22660266 -1.27244286 -5.18042809

H -2.93685496 -0.82026053 -4.95855074

N -1.54109164 -0.42486843 -2.15566586

O -4.62895147 -1.37472324 0.00121889

**S18. References**

1. Mitamura, Y., Yorimitsu, H., Oshima, K. & Osuka, A. Straightforward Access to Aryl-Substituted Tetrathiafulvalenes by Palladium-Catalysed Direct C–H Arylation and Their Photophysical and Electrochemical Properties. *Chem. Sci.* **2**, 2017-2021 (2011).

2. Sutar, P., Suresh, V. M. & Maji, T. K. Tunable Emission in Lanthanide Coordination Polymer Gels Based on A Rationally Designed Blue Emissive Gelator. *Chem. Commun.* **51**, 9876-9879 (2015).

3. Gelderman, K., Lee, L. & Donne, S. W. Flat-Band Potential of a Semiconductor: Using the Mott–Schottky Equation. *J. Chem. Edu.* **84**, 685-688 (2007).

4. Narayan, T. C., Miyakai, T., Seki, S. & Dinca, M. High Charge Mobility in a Tetrathiafulvalene Based Microporous Metal−Organic Framework. *J. Am. Chem. Soc.* **134**, 12932−12935 (2012).

5. Razzaq, A., Kang, A. S. T. H., Grimes, C. A., Yu, J. S. & In, S. Efficient Solar Light Photoreduction of CO2 to Hydrocarbon Fuels via Magnesiothermally Reduced TiO2 Photocatalyst. *Appl. Catal. B: Environ.* **215**, 28-35 (2017).

6. Lau, V. W. *et al.* Urea-Modified Carbon Nitrides: Enhancing Photocatalytic Hydrogen Evolution by Rational Defect Engineering. *Adv. Energy Mater.* **7**, 1602251-1602266 (2017).

7. Caputo, C. A. *et al.* Photocatalytic Hydrogen Production using Polymeric Carbon Nitride with a Hydrogenase and a Bioinspired Synthetic Ni Catalyst. *Angew. Chem. Int. Ed.* **53**, 11538 –11542 (2014).

8. Banerjee, T. *et al.* Single-Site Photocatalytic H2 Evolution from Covalent Organic Frameworks with Molecular Cobaloxime Co-Catalysts. *J. Am. Chem. Soc.* **139**, 16228-16234 (2017).

9. Biswal, B. P. *et al.* Sustained Solar H2 Evolution from a Thiazolo[5,4*‑d*]thiazole-Bridged Covalent Organic Framework and Nickel-Thiolate Cluster in Water. *J. Am. Chem. Soc.* **141**, 11082-11092 (2019).

10. Zhang, G. *et al.* Tailoring the Grain Boundary Chemistry of Polymeric Carbon Nitride for Enhanced Solar Hydrogen Production and CO2 Reduction. *Angew. Chem. Int. Ed.* **58**, 3433 –3437 (2019).

11. Woods, D. J. *et al.* Side-Chain Tuning in Conjugated Polymer Photocatalysts for Improved Hydrogen Production from Water. *Energy Environ. Sci.* DOI: 10.1039/d0ee01213k (2020).

12. Bai, Y. *et al.* Accelerated Discovery of Organic Polymer Photocatalysts for Hydrogen Evolution from Water through the Integration of Experiment and Theory. *J. Am. Chem. Soc.* **141**, 9063−9071 (2019).

13. Bera, R., Dutta, A., Kundu, S., Polshettiwar, V. & Patra, A. Design of a CdS/CdSe Heterostructure for Efficient H2 Generation and Photovoltaic Applications. *J. Phys. Chem. C* **122**, 12158−12167 (2018).

14. Kuehnel, M. F. *et al.* ZnSe Nanorods as Visible-Light Absorbers for Photocatalytic and Photoelectrochemical H2 Evolution in Water. *Angew. Chem. Int. Ed.* **58**, 5059 –5063 (2019).

15. Mothika, V. S. *et al.* Regulating Charge-Transfer in Conjugated Microporous Polymers for Photocatalytic Hydrogen Evolution. *Chem. Eur. J.* **25**, 3867 – 3874 (2019).

16. Yang, W. *et al.* Electron Accumulation Induces Efficiency Bottleneck for Hydrogen Production in Carbon Nitride Photocatalysts. *J. Am. Chem. Soc.* **141**, 11219-11229 (2019).

17. Sun, J., Schmidt, B. V. K. J., Wang, X. & Shalom, M. Self-Standing Carbon Nitride-Based Hydrogels with High Photocatalytic Activity. *ACS Appl. Mater. Interfaces* **9**, 2029−2034 (2017).

18. Chena, S. *et al.* Enhancement of Visible-Light-Driven Photocatalytic H2 Evolution From Water Over g-C3N4 Through Combination with Perylene Diimide Aggregates. *Appl. Catal., A* **498**, 63–68 (2015).

19. Kundu, S. & Polshettiwar, V. Hydrothermal Crystallization of Nano-Titanium Dioxide for Enhanced Photocatalytic Hydrogen Generation. *ChemPhotoChem* **2**, 796 –800 (2018).

20. Cai, J. G., Yu, Z. T., Yuan, Y. J., Li, F. & Zou, Z. G. Dinuclear Iridium(III) Complexes Containing Bibenzimidazole and Their Application to Water Photoreduction. *ACS Catal.* **4**, 1953-1963 (2014).

21. Mej, E. *et al.* A Noble-Metal-Free System for Photocatalytic Hydrogen Production from Water. *Chem. Eur. J.* **19**, 15972 – 15978 (2013).

22. Nolan, M. C. *et al.* pH Dependent Photocatalytic Hydrogen Evolution by Self-Assembled Perylene Bisimides. *J. Mater. Chem. A* **5**, 7555-7563 (2017).

23. Montoya, A. T. & Gillan, E. G. Enhanced Photocatalytic Hydrogen Evolution from Transition-Metal Surface-Modified TiO2. *ACS Omega* **3**, 2947−2955 (2018).

24. Roy, S. & Reisner, E. Visible-Light-Driven CO2 Reduction by Mesoporous Carbon Nitride Modified with Polymeric Cobalt Phthalocyanine. *Angew. Chem. Int. Ed.* **58**, 12180–12184 (2019).

25. Lu, M. *et al.* Rational Crystalline Covalent Organic Frameworks Design for Efficient CO2 Photoreduction with H2O. *Angew. Chem. Int. Ed.* **58**, 12392 –12397 (2019).

26. Jiang, Z. *et al.* Nature-based catalyst for visible-light-driven photocatalytic CO2 reduction. *Energy Environ. Sci.* **11**, 2382 (2018).

27. Zeng, C. *et al.* Fabrication of Heterogeneous-Phase Solid-Solution Promoting Band Structure and Charge Separation for Enhancing Photocatalytic CO2 Reduction: A Case of ZnXCa1−XIn2S4. *ACS Appl. Mater. Interfaces* **9**, 27773−27783 (2017).

28. Zhong, W. *et al.* A Covalent Organic Framework Bearing Single Ni Sites as a Synergistic Photocatalyst for Selective Photoreduction of CO2 to CO. *J. Am. Chem. Soc.* **141**, 7615−7621 (2019).

29. Xu, Y. F. *et al.* A CsPbBr3 Perovskite Quantum Dot/Graphene Oxide Composite for Photocatalytic CO2 Reduction. *J. Am. Chem. Soc.* **139**, 5660-5663 (2017).

30. Fu, Z. *et al.* A Stable Covalent Organic Framework for Photocatalytic Carbon Dioxide Reduction. *Chem. Sci.* **11**, 543-550 (2020).

31. Wang, Y., Wang, S. & Lou, X. W. D. Dispersed Nickel Cobalt Oxyphosphide Nanoparticles Confined in Multichannel Hollow Carbon Fibers for Photocatalytic CO2 Reduction. *Angew. Chem. Int. Ed.* **58**, 17236 –17240 (2019).

32. Ma, B. *et al.* Efficient Visible-Light-Driven CO2 Reduction by a Cobalt Molecular Catalyst Covalently Linked to Mesoporous Carbon Nitride. *J. Am. Chem. Soc.* **142**, 6188−6195 (2020).

33. Liu, W. *et al.* A Scalable General Synthetic Approach toward Ultrathin Imine-Linked Two-Dimensional Covalent Organic Framework Nanosheets for Photocatalytic CO2 Reduction. *J. Am. Chem. Soc.* **141**, 17431−17440 (2019).

34. Hong, D. *et al.* Efficient Photocatalytic CO2 Reduction by a Ni(II) Complex Having Pyridine Pendants through Capturing a Mg2+ Ion as a Lewis-Acid Cocatalyst. *J. Am. Chem. Soc.* **141**, 20309−20317 (2019).

35. Yang, S. *et al.* 2D Covalent Organic Frameworks as Intrinsic Photocatalysts for Visible Light-Driven CO2 Reduction. *J. Am. Chem. Soc.* **140**, 14614−14618 (2018).

36. Hong, D., Tsukakoshi, Y., Kotani, H., Ishizuka, T. & Kojima, T. Visible-Light-Driven Photocatalytic CO2 Reduction by a Ni(II) Complex Bearing a Bioinspired Tetradentate Ligand for Selective CO Production. *J. Am. Chem. Soc.* **139**, 6538−6541 (2017).

37. Kar, P. *et al.* Enhanced CH4 yield by photocatalytic CO2 reduction using TiO2 nanotube arrays grafted with Au, Ru, and ZnPd nanoparticles. *Nano Res.* **9**, 3478–3493 (2016).

38. Barrio, J., Mateo, D., Albero, J., Garcia, H. & Shalom, M. A Heterogeneous Carbon Nitride–Nickel Photocatalyst for Efficient Low-Temperature CO2 Methanation. *Adv. Energy Mater.* **9**, 1902738-1902745 (2019).

39. Fabry, D. C. *et al.* A Ru(II)−Mn(I) Supramolecular Photocatalyst for CO2 Reduction. *Organometallics* **39**, 1511-1518 (2020).

40. Wang, Y., Zhao, J., Li, Y. & Wang, C. Selective Photocatalytic CO2 Reduction to CH4 over Pt/In2O3: Significant Role of Hydrogen Adatom. *Appl. Catal. B: Environ.* **226**, 544–553 (2018).

41. Ziarati, A., Badiei, A., Luque, R., Dadras, M. & Burgi, T. Visible Light CO2 Reduction to CH4 Using Hierarchical Yolk@shell TiO2−xHx Modified with Plasmonic Au−Pd Nanoparticles. *ACS Sustainable Chem. Eng.* **8**, 3689−3696 (2020).

42. Kuehnel, M. F., Orchard, K. L., Dalle, K. E. & Reisner, E. Selective Photocatalytic CO2 Reduction in Water through Anchoring of a Molecular Ni Catalyst on CdS Nanocrystals. *J. Am. Chem. Soc.* **139**, 7217−7223 (2017).

43. Zhu, K. *et al.* Fabrication of Hierarchical ZnIn2S4@CNO Nanosheets for Photocatalytic Hydrogen Production and CO2 Photoreduction. *Chinese. J. Catal.* **41**, 454–463 (2020).

44. Wang, S. S. *et al.* Encapsulation of Single Iron Sites in a Metal−Porphyrin Framework for High-Performance Photocatalytic CO2 Reduction. *Inorg. Chem.* **59**, 6301−6307 (2020).

45. Tahir, B. *et al.* 2D/2D Mt/m-CN Composite with Enriched Interface Charge Transfer for Boosting Photocatalytic CO2 Hydrogenation by H2 to CH4 Under Visible Light. *Appl. Surf. Sci.* **520**, 146296-146309 (2020).

46. Zhang, R., Huang, Z., Li, C., Zuo, Y. & Zhou, Y. Monolithic g-C3N4/reduced graphene oxide aerogel with in situ embedding of Pd nanoparticles for hydrogenation of CO2 to CH4. *Appl. Surf. Sci.* **475**, 953-960 (2019).

47. Kumar, S., Regue, M., Isaacs, M. A., Freeman, E. & Eslava, S. All-Inorganic CsPbBr3 Nanocrystals: Gram-Scale Mechanochemical Synthesis and Selective Photocatalytic CO2 Reduction to Methane. *ACS Appl. Energy Mater.* **3**, 4509-4522 (2020).

48. Wu, X. *et al.* Multifunctional photocatalysts of Pt-decorated 3DOM perovskite-type SrTiO3 with enhanced CO2 adsorption and photoelectron enrichment for selective CO2 reduction with H2O to CH4. *J. Catal.* **377**, 309–321 (2019).

49. Wang, R., Shen, J., Sun, K., Tang, H. & Liu, Q. Enhancement in Photocatalytic Activity of CO2 Reduction to CH4 by 0D/2D Au/TiO2 Plasmon Heterojunction. *Appl. Sur. Sci.* **493**, 1142–1149 (2019).

50. Kong, Z. C. *et al.* Immobilizing Re(CO)3Br(dcbpy) Complex on CsPbBr3 Nanocrystal for Boosted Charge Separation and Photocatalytic CO2 Reduction. *Sol. RRL* **4**, 1900365-1900372 (2020).

51. Huang, S. *et al.* Non-Precious Molybdenum Nanospheres as a Novel Cocatalyst for Fullspectrum-Driven Photocatalytic CO2 Reforming to CH4. *J. Hazard. Mater.* **393**, 122324-122331 (2020).

52. Pan, A. *et al.* CsPbBr3 Perovskite Nanocrystal Grown on MXene Nanosheets for Enhanced Photoelectric Detection and Photocatalytic CO2 Reduction. *J. Phys. Chem. Lett.* **10**, 6590−6597 (2019).

53. Wang, X., Zhao, X., Zhang, D., Li, G. & Li, H. Microwave Irradiation Induced UIO-66-NH2 Anchored on Graphene with High Activity for Photocatalytic Reduction of CO2. *Appl. Catal. B: Environ.* **228**, 47-53 (2018).

54. Zhang, J. X., Hu, C. Y., Wang, W., Wang, H. & Bian, Z. Y. Visible light driven reduction of CO2 catalyzed by an abundantmanganese catalyst with zinc porphyrin photosensitizer. *Applied Catalysis A: General* **522**, 145-151 (2016).

55. Wang, S. & Wang, X. Photocatalytic CO2 Reduction by CdS Promoted with a Zeolitic Imidazolate Framework. *Appl. Catal. B: Environ.* **162**, 494–500 (2015).

56. Miehlich, B.; Savin, A.; Stoll H.; Preuss, H., Results Obtained with the Correlation Energy Density Functionals of Becke and Lee, Yang and Parr. *Chem. Phys. Lett.* **157**, 200-206 (1989).

57. Grimme, S.; Antony, J.; Ehrlich S.; Krieg, H., A Consistent and Accurate ab Initio Parametrization of Density Functional Dispersion Correction (DFT-D) for the 94 Elements H-Pu. *J. Chem. Phys.* **132**, 154104 (1-19) (2010).

58. Grimme, S., Accurate Description of Van der Waals Complexes by Density Functional Theory Including Empirical Corrections. *J. Comput. Chem.* **25**, 1463-1476 (2004).

59. Grimme, S. Semiempirical GGA‐Type Density Functional Constructed with a Long‐Range Dispersion Correction. *J. Comput. Chem.* **27**, 1787-1799 (2006).

60. Becke, A. D.;A new mixing of Hartree–Fock and local density‐functional theories. *J. Chem. Phys.* **98**, 1372 (1993).

61. Lee, C.; Yang, W.; Parr, R. G.; Density-functional exchange-energy approximation with correct asymptotic behavior. *Phys. Rev. B*. **37**, 785-789 (1988).

62. Hay, P. J.; Wadt, W. R., Ab Initio Effective Core Potentials for Molecular Calculations. Potentials for the Transition Metal Atoms Sc to Hg. *J. Chem. Phys.* **82**, 270 (1985).

63. Wadt, W. R.; Hay, P. J., Ab Initio Effective Core Potentials for Molecular Calculations. Potentials for Main Group Elements Na to Bi. *J. Chem. Phys*. **82**, 284 (1985).

64. Yanai, T.; Tew, D. P.; Handy, N. C., A New Hybrid Exchange–Correlation Functional using the Coulomb-Attenuating Method (CAM-B3LYP). *Chem. Phys. Lett.* **51**, 393 (2004).

65. Chai, J.-D.; Head-Gordon, M., Systematic Optimization of Long-Range Corrected Hybrid Density Functionals. *J. Chem. Phys.* **128**, 084106 (2008).

66. Chai, J.-D.; Head-Gordon, M., Long-Range Corrected Hybrid Density Functionals with Damped Atom–Atom Dispersion Corrections. *Phys. Chem. Chem. Phys.* **10**, 6615 (2008).

67. Scalmani, G.; Frisch, M. J., Continuous Surface Charge Polarizable Continuum Models of Solvation. I. General Formalism. *J. Chem. Phys.* **132**, 114110 (2010).

68. Frisch, M. J.; Trucks, G. W.; Schlegel, H. B.; Scuseria, G. E.; Robb, M. A.; Cheeseman, J. R.; Scalmani, G.; Barone, V.; Petersson, G. A.; Nakatsuji, H.; Li, X.; Caricato, M.; Marenich, A. V.; Bloino, J.; Janesko, B. G.; Gomperts, R.; Mennucci, B.; Hratchian, H. P.; Ortiz, J. V.; Izmaylov, A. F.; Williams, J. L.; Ding, F.; Lipparini, F.; Egidi, F.; Goings, J.; Peng, B.; Peltrone, A.; Henderson, T.; Ranasinghe, D.; Zakrzewski, V. G.; Gao, J.; Rega, N.; Zheng, G.; Liang, W.; Hada, M.; Ehara, M.; Toyota, K.; Fukuda, R.; Hasegawa, J.; Ishida, M.; Nakajima, T.; Honda, Y.; Kitao, O.; Nakai, H.; Vreven, T.; Throssell K.; Montgomery Jr, J. A.; Peralta, J. E.; Ogliaro, F.; Bearpark, M. J.; Heyd, J. J.; Brothers, E. N.; Kudin, K. N.; Staroverov, V. N.; Keith, T. A.; Kobayashi, R.; Normand, J.; Raghavachari, K.; Rendell, A. P.; Burant, J. C.; Iyengar, S. S.; Tomasi, J.; Cossi, M.; Millam, J. M.; Klene, M.; Adamo, C.; Cammi, R.; Ochterski, J. W.; Martin, R. L.; Morokuma, K.; Farkas, O.; Foresman, J. B.; Fox, D. J.; Gaussian 16, Revision A. 03, Gaussian. Inc., Wallingford CT, (2016).
